# Supplementary material for: Unravelling the diversity of magnetotactic bacteria through analysis of open genomic databases
Source: PubMed Central journal article supplement (PMC7449369; doi:10.1038/s41597-020-00593-0), 2020-07-31
Supplement: 41597_2020_593_MOESM1_ESM.pdf [file 41597_2020_593_MOESM1_ESM.pdf]

## Supplementary information

### UNRAVELLING THE DIVERSITY OF MAGNETOTACTIC BACTERIA THROUGH ANALYSIS OF OPEN GENOMIC DATABASES

Maria Uzun, Lolita Alekseeva, Maria Krutkina, Veronika KoZIAeva and Denis Grouzdev

#### Content

|                                       |    |
|---------------------------------------|----|
| <b>Supplementary Figure S1.</b> ..... | 1  |
| <b>Supplementary Figure S2.</b> ..... | 3  |
| <b>Supplementary Figure S3.</b> ..... | 4  |
| <b>Supplementary Figure S4.</b> ..... | 5  |
| <b>Supplementary Table S1</b> .....   | 6  |
| <b>Supplementary Table S2</b> .....   | 12 |
| <b>Supplementary Table S3</b> .....   | 14 |
| <b>Supplementary Table S4</b> .....   | 20 |
| <b>Supplementary Table S5</b> .....   | 29 |

a

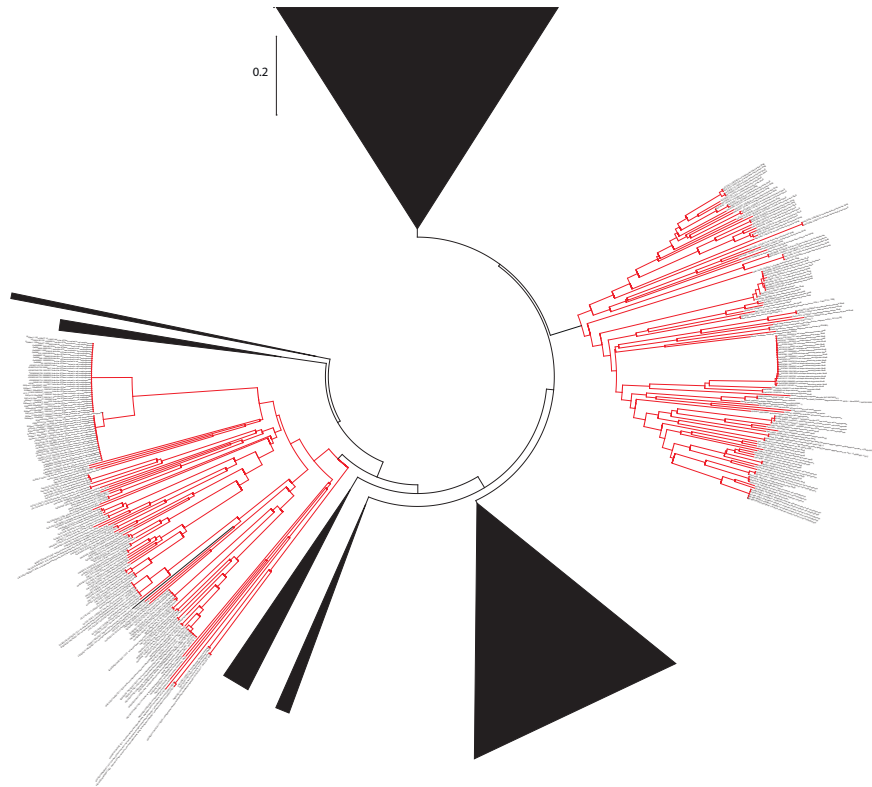

b

• Bootstrap values > 75%

- Ca. Omnitrophica
- Nitrospirae
- Deltaproteobacteria
- Ca. Lambdaproteobacteria
- Zetaproteobacteria
- Gammaproteobacteria
- Ca. 'Etaproteobacteria'
- Alphaproteobacteria
- Genomic data
- Metagenomic data

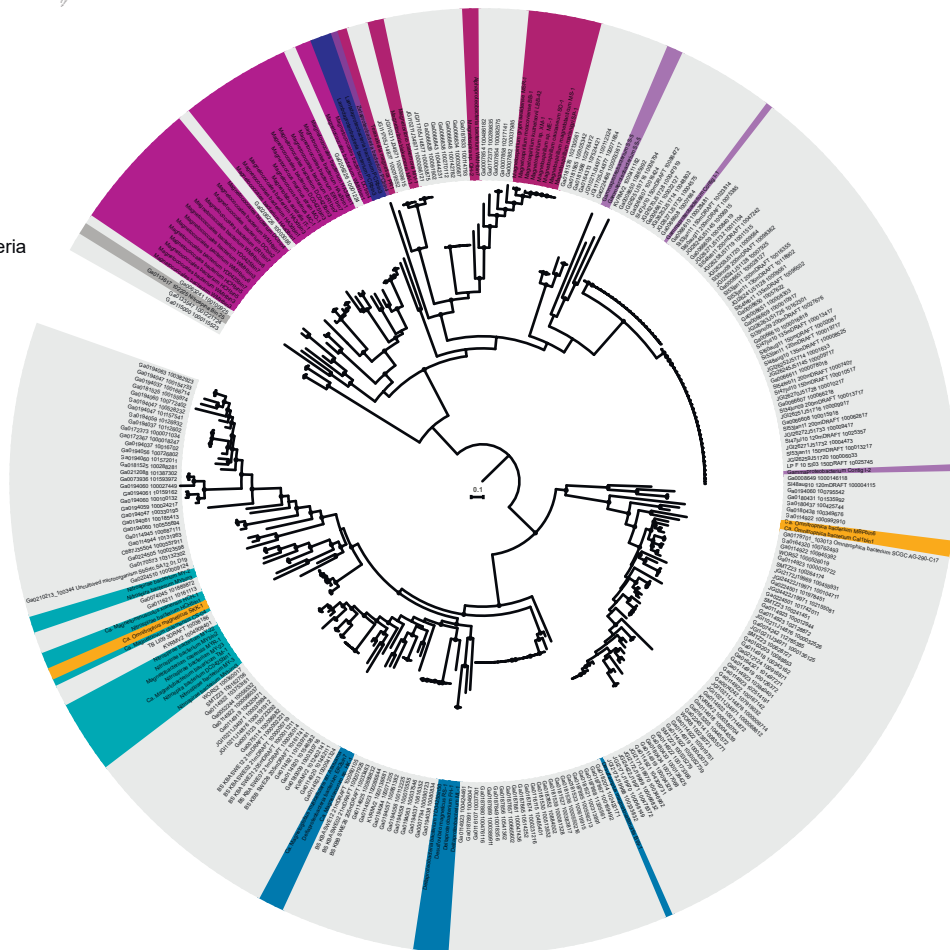

**Supplementary Figure S1. Sequences obtained from the search for MamK protein in IMG database.**

(a) Maximum-likelihood phylogenetic tree of 2798 sequences obtained from IMG database potentially affiliated with the MamK protein. Red-colored branches represent sequences, in the scaffolds of which the presence of other Mam proteins was detected. (b) Maximum-likelihood phylogenetic tree based on MamK sequences remained after checking for presence of other Mam proteins in scaffolds with MamK. Both trees were reconstructed with the evolutionary model LG+I+G4. Branch supports were obtained with 1000 ultrafast bootstraps. The scale bars represent amino acid substitutions per site.

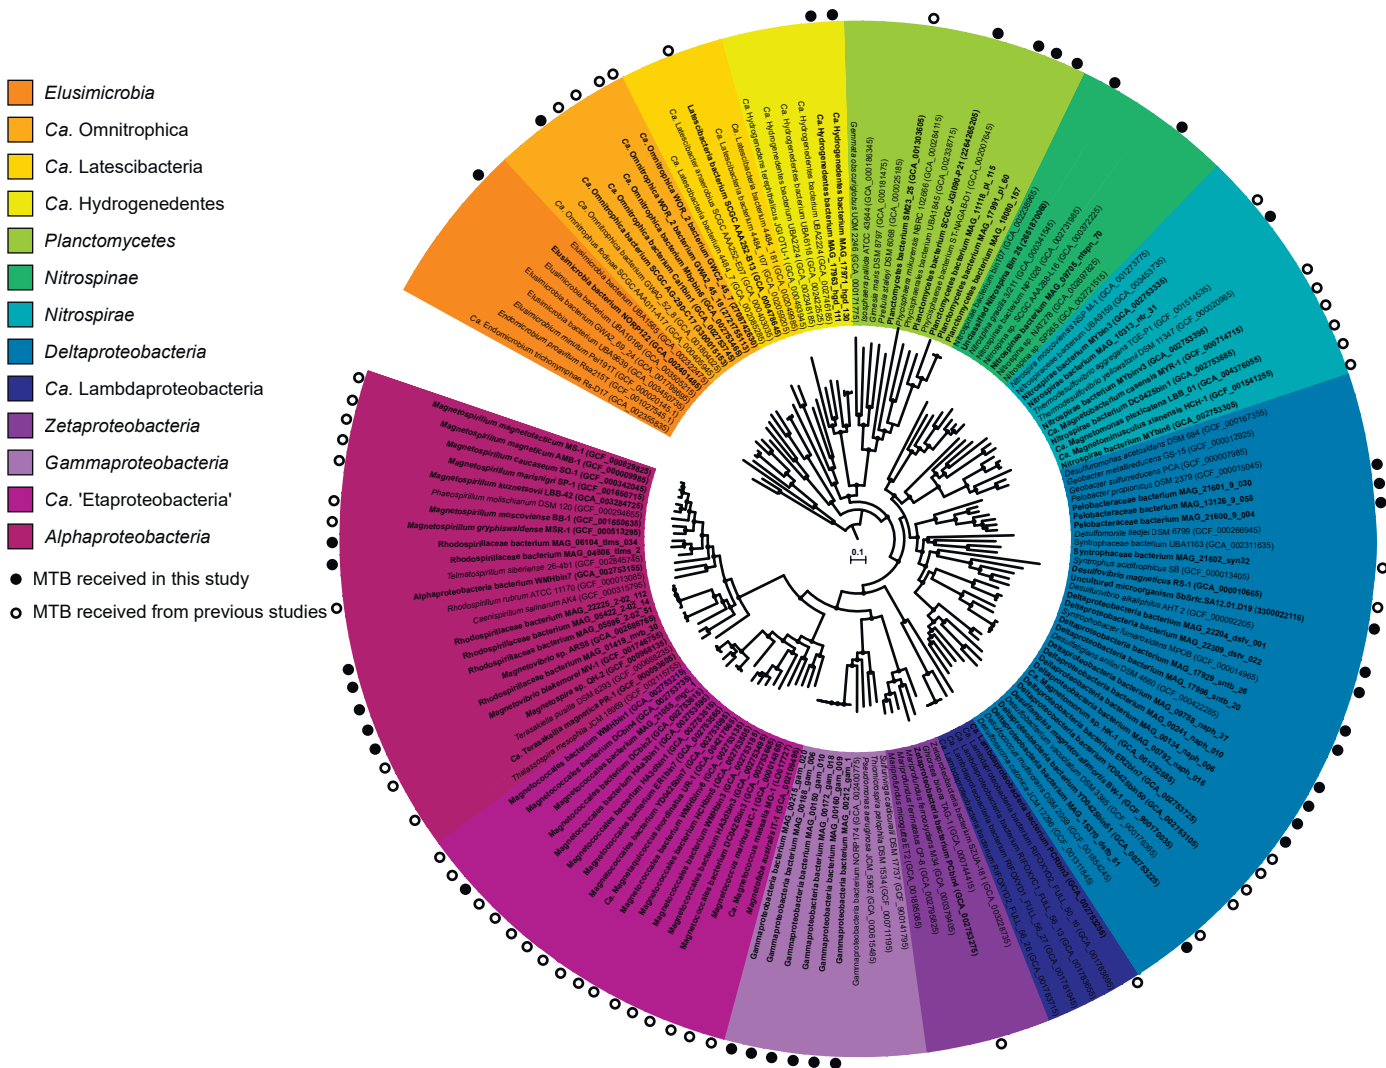

**Supplementary Figure S2. Maximum-likelihood phylogenetic tree based on 120 concatenated single copy marker proteins.** The tree was reconstructed with the evolutionary model LG+F+I+G4 and 1000 ultrafast bootstraps (bold circles indicate bootstrap 100%). The scale bar represents amino acid substitutions per site.

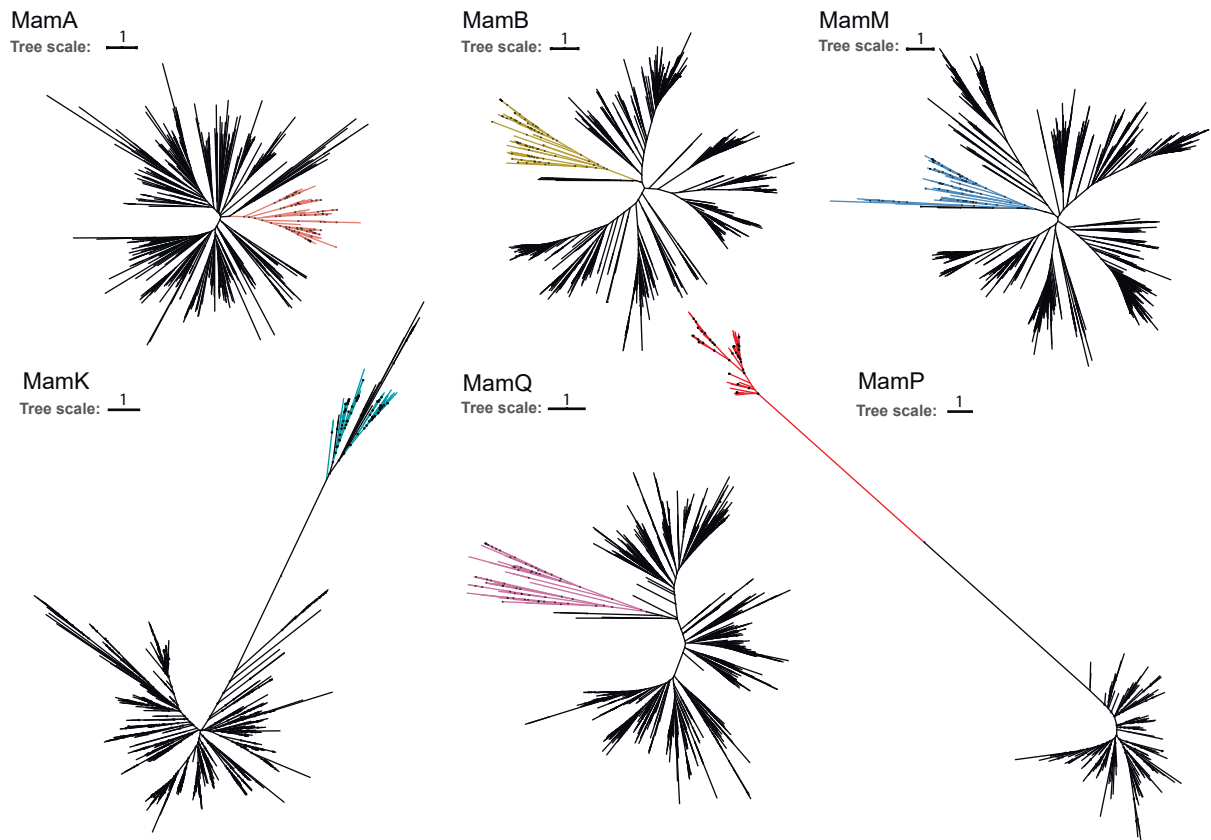

**Supplementary Figure S3. Maximum-likelihood phylogenetic trees of MamA, -B, -M, -K, -P, and -Q protein sequences (colored) with their homologs (black).** The trees were reconstructed with the evolutionary model LG+F+I+G4 and 1000 ultrafast bootstraps. The scale bar represents amino acid substitutions per site.

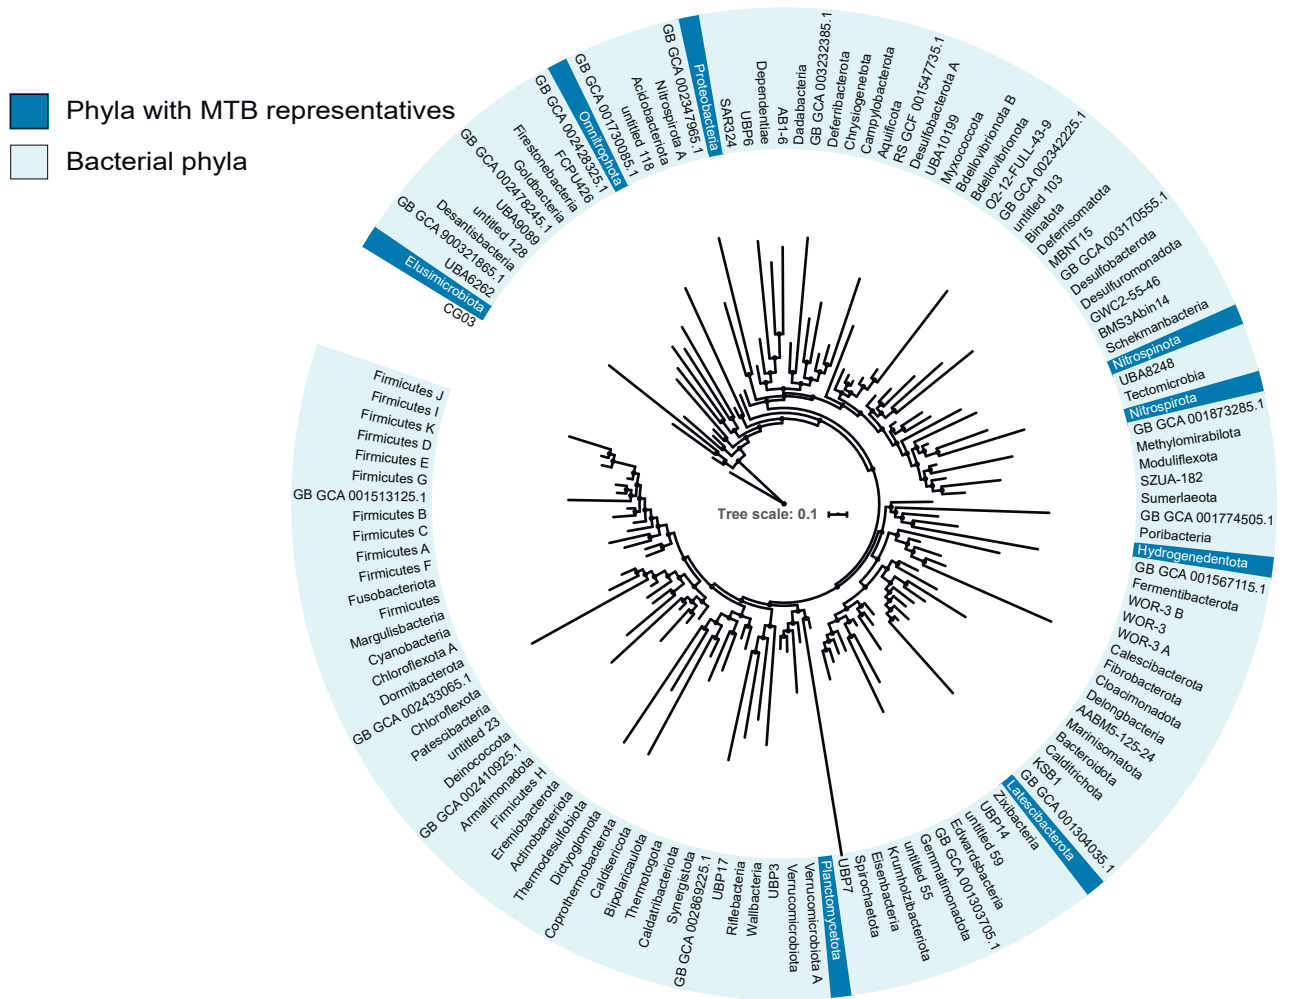

**Supplementary Figure S4. The bacterial tree of life, based on GTDB R04-RS89 reference data.** The tree was visualised using newick file from annotree site (<http://annotree.uwaterloo.ca/app/>)

| Organism                                     | Phylum/Class               | Accession in NCBI/IMG | Taxonomy (GTDB)                                                                                                                                              | Size (bp) | Scaffolds (no.) | GC (%) | N50 (bp) | CheckM completeness (%) | CheckM contamination (%) |
|----------------------------------------------|----------------------------|-----------------------|--------------------------------------------------------------------------------------------------------------------------------------------------------------|-----------|-----------------|--------|----------|-------------------------|--------------------------|
| Alphaproteobacteria bacterium WMHbin7        | <i>Alphaproteobacteria</i> | GCA_002753155.1       | d_Bacteria;p__Proteobacteria;c__Alphaproteobacteria;o__Rhodospirillales_B;f__WMHbin7;g__WMHbin7;s__WMHbin7 sp002753155                                       | 2984788   | 73              | 59.84  | 91589    | 91.54                   | 0.12                     |
| <i>Magnetospira</i> sp. QH-2                 | <i>Alphaproteobacteria</i> | 2627853728            | d_Bacteria;p__Proteobacteria;c__Alphaproteobacteria;o__Rhodospirillales_A;f__Magnetospiraceae;g__Magnetospira;s__Magnetospira sp000968135                    | 4052370   | 2               | 59.44  | 4021307  | 99.50                   | 1.00                     |
| <i>Magnetospirillum kuznetsovii</i> LBB-42   | <i>Alphaproteobacteria</i> | GCA_003284725.1       | d_Bacteria;p__Proteobacteria;c__Alphaproteobacteria;o__Rhodospirillales_B;f__Magnetospirillaceae;g__Magnetospirillum_A;s__Magnetospirillum_A sp003284725     | 4405793   | 69              | 63.44  | 215319   | 99.50                   | 0.50                     |
| <i>Magnetospirillum magneticum</i> AMB-1     | <i>Alphaproteobacteria</i> | 637000155             | d_Bacteria;p__Proteobacteria;c__Alphaproteobacteria;o__Rhodospirillales_B;f__Magnetospirillaceae;g__Magnetospirillum_A;s__Magnetospirillum_A magneticum      | 4967148   | 1               | 65.09  | 4967148  | 99.00                   | 0.00                     |
| <i>Magnetospirillum magnetotacticum</i> MS-1 | <i>Alphaproteobacteria</i> | 2645727833            | d_Bacteria;p__Proteobacteria;c__Alphaproteobacteria;o__Rhodospirillales_B;f__Magnetospirillaceae;g__Magnetospirillum_A;s__Magnetospirillum_A magnetotacticum | 4523935   | 36              | 63.56  | 541957   | 99.50                   | 0.00                     |
| <i>Magnetospirillum marisnigri</i> SP-1      | <i>Alphaproteobacteria</i> | GCF_001650715.1       | d_Bacteria;p__Proteobacteria;c__Alphaproteobacteria;o__Rhodospirillales_B;f__Magnetospirillaceae;g__Magnetospirillum_A;s__Magnetospirillum_A marisnigri      | 4619819   | 131             | 64.73  | 168256   | 100.00                  | 0.00                     |
| <i>Magnetospirillum moscoviense</i> BB-1     | <i>Alphaproteobacteria</i> | GCF_001650635.1       | d_Bacteria;p__Proteobacteria;c__Alphaproteobacteria;o__Rhodospirillales_B;f__Magnetospirillaceae;g__Magnetospirillum;s__Magnetospirillum moscoviense         | 4164497   | 207             | 65.18  | 52974    | 100.00                  | 0.00                     |
| <i>Magnetospirillum</i> sp. ME-1             | <i>Alphaproteobacteria</i> | GCA_002105535.1       | d_Bacteria;p__Proteobacteria;c__Alphaproteobacteria;o__Rhodospirillales;f__Magnetospirillaceae;g__Magnetospirillum_A;s__GCF_002105535.1                      | 4551873   | 1               | 65.63  | 4551873  | 99.50                   | 0.50                     |
| <i>Magnetospirillum</i> sp. XM-1             | <i>Alphaproteobacteria</i> | GCA_001511835.1       | d_Bacteria;p__Proteobacteria;c__Alphaproteobacteria;o__Rhodospirillales;f__Magnetospirillaceae;g__Magnetospirillum_A;s__GCF_001511835.1                      | 4992477   | 2               | 65.67  | 4825187  | 99.50                   | 0.50                     |
| <i>Magnetospirillum caucaseum</i> SO-1       | <i>Alphaproteobacteria</i> | GCF_000342045.1       | d_Bacteria;p__Proteobacteria;c__Alphaproteobacteria;o__Rhodospirillales_B;f__Magnetospirillaceae;g__Magnetospirillum_A;s__Magnetospirillum_A                 | 4870514   | 236             | 65.99  | 55386    | 99.50                   | 0.50                     |

|                                               |                              |                 |                                                                                                                                                                      |         |     |       |         |        |      |
|-----------------------------------------------|------------------------------|-----------------|----------------------------------------------------------------------------------------------------------------------------------------------------------------------|---------|-----|-------|---------|--------|------|
|                                               |                              |                 | caucaseum                                                                                                                                                            |         |     |       |         |        |      |
| <i>Magnetospirillum gryphiswaldense</i> MSR-1 | <i>Alphaproteobacteria</i>   | GCF_000513295.1 | d__Bacteria;p__Proteobacteria;c__Alphaproteobacteria;<br>o__Rhodospirillales_B;f__Magnetospirillaceae;<br>g__Magnetospirillum;s__Magnetospirillum<br>gryphiswaldense | 4365716 | 1   | 63.29 | 4365716 | 99.88  | 0.00 |
| <i>Magnetovibrio blakemorei</i> MV-1          | <i>Alphaproteobacteria</i>   | GCF_001746755.1 | d__Bacteria;p__Proteobacteria;c__Alphaproteobacteria;<br>o__Rhodospirillales_A;f__Magnetovibrionaceae;<br>g__Magnetovibrio;s__Magnetovibrio blakemorei               | 3638804 | 91  | 54.29 | 95462   | 98.51  | 0.50 |
| <i>Terasakiella magnetica</i> PR1             | <i>Alphaproteobacteria</i>   | GCF_900093605.1 | d__Bacteria;p__Proteobacteria;c__Alphaproteobacteria;<br>o__Rhodospirillales_A;f__Terasakiellaceae;<br>g__Terasakiella;s__Terasakiella sp900093605                   | 3687561 | 48  | 45.97 | 253666  | 100.00 | 0.62 |
| Magnetococcales bacterium DCbin2              | <i>Ca. Etaproteobacteria</i> | GCA_002753615.1 | d__Bacteria;p__Proteobacteria;c__Magnetococcia;<br>o__Magnetococcales;f__UBA8363;<br>g__UBA8363;s__UBA8363 sp002753615                                               | 3364396 | 201 | 51.85 | 24837   | 77.26  | 1.68 |
| Magnetococcales bacterium DCbin4              | <i>Ca. Etaproteobacteria</i> | GCA_002753735.1 | d__Bacteria;p__Proteobacteria;c__Magnetococcia;<br>o__Magnetococcales;f__UBA8363;<br>g__UBA8363;s__UBA8363 sp002753735                                               | 4521331 | 148 | 54.25 | 49732   | 94.12  | 2.10 |
| Magnetococcales bacterium ER1bin7             | <i>Ca. Etaproteobacteria</i> | GCA_002753565.1 | d__Bacteria;p__Proteobacteria;c__Magnetococcia;<br>o__Magnetococcales;f__UBA8363;<br>g__GCA-2753565;s__GCA-2753565 sp002753565                                       | 3866744 | 92  | 52.30 | 116043  | 99.11  | 1.68 |
| Magnetococcales bacterium HA3dbin1            | <i>Ca. Etaproteobacteria</i> | GCA_002753515.1 | d__Bacteria;p__Proteobacteria;c__Magnetococcia;<br>o__Magnetococcales;f__UBA8363;<br>g__UBA8363;s__UBA8363 sp002753515                                               | 4326896 | 134 | 53.32 | 54627   | 96.57  | 3.36 |
| Magnetococcales bacterium HA3dbin3            | <i>Ca. Etaproteobacteria</i> | GCA_002753495.1 | d__Bacteria;p__Proteobacteria;c__Magnetococcia;<br>o__Magnetococcales;f__DC0425bin3;<br>g__HA3dbin3;s__HA3dbin3 sp002753495                                          | 2895658 | 316 | 61.72 | 13187   | 74.36  | 2.52 |
| Magnetococcales bacterium HAa3bin1            | <i>Ca. Etaproteobacteria</i> | GCA_002753595.1 | d__Bacteria;p__Proteobacteria;c__Magnetococcia;<br>o__Magnetococcales;f__UBA8363;<br>g__UBA8363;s__UBA8363 sp002753515                                               | 4347394 | 118 | 53.21 | 63208   | 98.25  | 4.20 |
| Magnetococcales bacterium HCHbin5             | <i>Ca. Etaproteobacteria</i> | GCA_002753505.1 | d__Bacteria;p__Proteobacteria;c__Magnetococcia;<br>o__Magnetococcales;f__WMHbin3;<br>g__HCHbin5;s__HCHbin5 sp002753505                                               | 4188618 | 200 | 56.97 | 38237   | 98.99  | 4.73 |
| Magnetococcales bacterium WMHbin1             | <i>Ca. Etaproteobacteria</i> | GCA_002753215.1 | d__Bacteria;p__Proteobacteria;c__Magnetococcia;<br>o__Magnetococcales;f__UBA8363;<br>g__UBA8363;s__UBA8363 sp002753735                                               | 4380192 | 242 | 54.30 | 24882   | 98.32  | 2.94 |

|                                                        |                              |                 |                                                                                                                                        |          |      |       |         |       |       |
|--------------------------------------------------------|------------------------------|-----------------|----------------------------------------------------------------------------------------------------------------------------------------|----------|------|-------|---------|-------|-------|
| Magnetococcales bacterium WMHbin3                      | <i>Ca. Etaproteobacteria</i> | GCA_002753185.1 | d__Bacteria;p__Proteobacteria;c__Magnetococcia;o__Magnetococcales;f__WMHbin3;g__WMHbin3;s__WMHbin3 sp002753185                         | 4601373  | 157  | 61.61 | 51212   | 93.53 | 2.10  |
| Magnetococcales bacterium WMHbin6                      | <i>Ca. Etaproteobacteria</i> | GCA_002753135.1 | d__Bacteria;p__Proteobacteria;c__Magnetococcia;o__Magnetococcales;f__WMHbin3;g__WMHbin6;s__WMHbin6 sp002753135                         | 3839927  | 80   | 55.32 | 85378   | 95.80 | 2.52  |
| Magnetococcales bacterium YD0425bin7                   | <i>Ca. Etaproteobacteria</i> | GCA_002753095.1 | d__Bacteria;p__Proteobacteria;c__Magnetococcia;o__Magnetococcales;f__WMHbin3;g__WMHbin6;s__WMHbin6 sp002753095                         | 3583729  | 177  | 55.67 | 34600   | 96.42 | 1.68  |
| <i>Magnetococcus marinus</i> MC-1                      | <i>Ca. Etaproteobacteria</i> | 639633036       | d__Bacteria;p__Proteobacteria;c__Magnetococcia;o__Magnetococcales;f__Magnetococcaceae;g__Magnetococcus;s__Magnetococcus marinus        | 4719581  | 1    | 54.17 | 4719581 | 98.32 | 0.84  |
| <i>Magnetococcus massalia</i> MO-1                     | <i>Ca. Etaproteobacteria</i> | LO017727.1      | d__Bacteria;p__Proteobacteria;c__Magnetococcia;o__Magnetococcales;f__Magnetococcaceae;g__;s__                                          | 5043095  | 1    | 55.18 | 5043095 | 98.32 | 0.00  |
| <i>Magnetofaba australis</i> IT-1                      | <i>Ca. Etaproteobacteria</i> | 2786546855      | d__Bacteria;p__Proteobacteria;c__Magnetococcia;o__Magnetococcales;f__Magnetococcaceae;g__Magnetofaba;s__Magnetofaba australis          | 4986701  | 21   | 61.30 | 705613  | 98.74 | 0.84  |
| <i>Ca. Magnetaquicoccus inordinatus</i> UR-1           | <i>Ca. Etaproteobacteria</i> | GCA_004217665.1 | d__Bacteria;p__Proteobacteria;c__Magnetococcia;o__Magnetococcales;f__WMHbin3;g__WMHbin6;s__                                            | 4143644  | 546  | 52.51 | 13993   | 97.40 | 3.78  |
| Magnetococcales bacterium DC0425bin3                   | <i>Ca. Etaproteobacteria</i> | GCA_002753665.1 | d__Bacteria;p__Proteobacteria;c__Magnetococcia;o__Magnetococcales;f__DC0425bin3;g__DC0425bin3;s__DC0425bin3 sp002753665                | 3696616  | 230  | 65.40 | 26687   | 98.32 | 1.68  |
| <i>Ca. Magnetoglobus multicellularis</i> str. Araruama | <i>Deltaproteobacteria</i>   | 2558860350      | d__Bacteria;p__Desulfobacterota;c__Desulfobacteria;o__Desulfobacterales;f__Magnetomoraceae;g__;s__                                     | 12453848 | 3705 | 37.27 | 6143    | 98.21 | 19.24 |
| <i>Ca. Magnetomorum</i> sp. HK-1                       | <i>Deltaproteobacteria</i>   | 2648501189      | d__Bacteria;p__Desulfobacterota;c__Desulfobacteria;o__Desulfobacterales;f__Magnetomoraceae;g__Magnetomorum;s__                         | 14290418 | 3036 | 34.61 | 18233   | 96.94 | 3.57  |
| Deltaproteobacteria bacterium ER2bin7                  | <i>Deltaproteobacteria</i>   | GCA_002753725.1 | d__Bacteria;p__Desulfobacterota;c__Desulfobacteria;o__Desulfobacterales;f__Magnetomoraceae;g__Magnetomorum;s__Magnetomorum sp002753725 | 5965504  | 653  | 38.47 | 12662   | 88.06 | 0.70  |
| Deltaproteobacteria bacterium YD0425bin50              | <i>Deltaproteobacteria</i>   | GCA_002753105.1 | d__Bacteria;p__Desulfobacterota;c__Desulfobacteria;o__Desulfobacterales;f__YD0425bin50;                                                | 4970345  | 589  | 36.91 | 11398   | 80.69 | 2.26  |



|                                             |                             |                 |                                                                                                                                                     |         |      |       |         |        |       |
|---------------------------------------------|-----------------------------|-----------------|-----------------------------------------------------------------------------------------------------------------------------------------------------|---------|------|-------|---------|--------|-------|
|                                             |                             |                 | g__YD0425bin50;s__YD0425bin50 sp002753105                                                                                                           |         |      |       |         |        |       |
| Deltaproteobacteria bacterium YD0425bin51   | <i>Deltaproteobacteria</i>  | GCA_002753225.1 | d__Bacteria;p__Desulfobacterota;c__Desulfobacteria;o__Desulfobacterales;f__YD0425bin51;g__YD0425bin51;s__YD0425bin51 sp002753225                    | 5221616 | 134  | 32.23 | 82896   | 96.13  | 0.84  |
| Deltaproteobacterium contig G-2*            | <i>Deltaproteobacteria</i>  |                 | -                                                                                                                                                   |         |      |       |         |        |       |
| Deltaproteobacterium FH-1*                  | <i>Deltaproteobacteria</i>  |                 | -                                                                                                                                                   |         |      |       |         |        |       |
| Deltaproteobacterium ML-1*                  | <i>Deltaproteobacteria</i>  |                 | -                                                                                                                                                   |         |      |       |         |        |       |
| <i>Desulfamplus magnetovallimortis</i> BW-1 | <i>Deltaproteobacteria</i>  | GCF_900170035.1 | d__Bacteria;p__Desulfobacterota;c__Desulfobacteria;o__Desulfobacterales;f__Desulfobacteraceae;g__Desulfamplus;s__Desulfamplus magnetovallimortis    | 6677998 | 108  | 40.72 | 274785  | 95.97  | 2.15  |
| <i>Desulfovibrio magneticus</i> RS-1        | <i>Deltaproteobacteria</i>  | 644736352       | d__Bacteria;p__Desulfobacterota_A;c__Desulfovibrionia;o__Desulfovibrionales;f__Desulfovibrionaceae;g__Desulfovibrio_F;s__Desulfovibrio_F magneticus | 5315620 | 3    | 62.67 | 5248049 | 100.00 | 0.00  |
| Gammaproteobacterium Contig I-1*            | <i>Gammaproteobacteria</i>  | 3300000174      | -                                                                                                                                                   |         |      |       |         |        |       |
| Gammaproteobacterium Contig I-2*            | <i>Gammaproteobacteria</i>  | 3300003600      | -                                                                                                                                                   |         |      |       |         |        |       |
| Gammaproteobacterium SS-5*                  | <i>Gammaproteobacteria</i>  | taxonID: 947516 | -                                                                                                                                                   |         |      |       |         |        |       |
| Lambdaproteobacteria bacterium PCRbin3      | <i>Lambdaproteobacteria</i> | GCA_002753255.1 | d__Bacteria;p__SAR324;c__SAR324;o__SAR324;f__GCA-2753255;g__GCA-2753255;s__GCA-2753255 sp002753255                                                  | 5059199 | 530  | 41.83 | 14906   | 77.14  | 0.96  |
| Zetaproteobacteria bacterium PCbin4         | <i>Zetaproteobacteria</i>   | GCA_002753275.1 | d__Bacteria;p__Proteobacteria;c__Zetaproteobacteria;o__Mariprofundales;f__Mariprofundaceae;g__GCA-2753275;s__GCA-2753275 sp002753275                | 1864480 | 55   | 47.58 | 58094   | 95.33  | 0.84  |
| Planctomycetes bacterium SM23_25            | <i>Planctomycetes</i>       | 2654588058      | d__Bacteria;p__Planctomycetota;c__FEN-1346;o__FEN-1346;f__FEN-1346;g__s__                                                                           | 3770408 | 418  | 66.68 | 9069    | 62.78  | 3.98  |
| <i>Ca. Magnetobacterium bavaricum</i> TM-1  | <i>Nitrospirae</i>          | 2639762806      | d__Bacteria;p__Nitrospirota;c__Thermodesulfovibrionia;o__Thermodesulfovibrionales;f__Magnetobacteriaceae;g__Magnetobacterium;s__                    | 6087939 | 2147 | 47.36 | 4856    | 94.09  | 34.50 |

|                                              |                    |                 |                                                                                                                                                              |         |      |       |       |       |       |
|----------------------------------------------|--------------------|-----------------|--------------------------------------------------------------------------------------------------------------------------------------------------------------|---------|------|-------|-------|-------|-------|
| <i>Ca. Magnetobacterium casensis</i> MYR-1   | <i>Nitrospirae</i> | 2585427832      | d__Bacteria;p__Nitrospirota;c__Thermodesulfovibrionia;o__Thermodesulfovibrionales;f__Magnetobacteriaceae;g__Magnetobacterium;s__Magnetobacterium casensis    | 3415676 | 70   | 48.87 | 90253 | 92.42 | 0.91  |
| <i>Ca. Magnetominusculus xianensis</i> HCH-1 | <i>Nitrospirae</i> | 2728369050      | d__Bacteria;p__Nitrospirota;c__Thermodesulfovibrionia;o__Thermodesulfovibrionales;f__Magnetobacteriaceae;g__HCH-1;s__HCH-1 sp001541255                       | 3593273 | 152  | 45.37 | 45767 | 98.18 | 0.91  |
| <i>Ca. Magnetoovum chiemensis</i> CS-04      | <i>Nitrospirae</i> | 2634166494      | d__Bacteria;p__Nitrospirota;c__Thermodesulfovibrionia;o__Thermodesulfovibrionales;f__;g__;s__                                                                | 3757890 | 869  | 40.38 | 9981  | 89.01 | 17.18 |
| <i>Nitrospirae</i> bacterium contig I-3*     | <i>Nitrospirae</i> | 3300000229      | -                                                                                                                                                            | -       | -    | -     | -     | -     | -     |
| <i>Nitrospirae</i> bacterium DC0425bin1      | <i>Nitrospirae</i> | GCA_002753685.1 | d__Bacteria;p__Nitrospirota;c__Thermodesulfovibrionia;o__Thermodesulfovibrionales;f__Magnetobacteriaceae;g__Magnetobacterium;s__Magnetobacterium sp002753685 | 4024796 | 107  | 49.04 | 75024 | 96.97 | 1.82  |
| <i>Nitrospirae</i> bacterium MYbin3          | <i>Nitrospirae</i> | GCA_002753335.1 | d__Bacteria;p__Nitrospirota;c__Thermodesulfovibrionia;o__Thermodesulfovibrionales;f__UBA9935;g__MYbin3;s__MYbin3 sp002753335                                 | 2929370 | 66   | 44.36 | 86724 | 96.49 | 0.91  |
| <i>Nitrospirae</i> bacterium MYbin6          | <i>Nitrospirae</i> | GCA_002753305.1 | d__Bacteria;p__Nitrospirota;c__Thermodesulfovibrionia;o__Thermodesulfovibrionales;f__Magnetobacteriaceae;g__HCH-1;s__HCH-1 sp002753305                       | 3596763 | 218  | 47.78 | 26590 | 85.35 | 2.73  |
| <i>Nitrospirae</i> bacterium MY-3*           | <i>Nitrospirae</i> | -               | -                                                                                                                                                            | -       | -    | -     | -     | -     | -     |
| <i>Nitrospirae</i> bacterium MYbin2*         | <i>Nitrospirae</i> | -               | -                                                                                                                                                            | -       | -    | -     | -     | -     | -     |
| <i>Nitrospirae</i> bacterium MYbinv3         | <i>Nitrospirae</i> | GCA_002753395.1 | d__Bacteria;p__Nitrospirota;c__Thermodesulfovibrionia;o__Thermodesulfovibrionales;f__Magnetobacteriaceae;g__Magnetobacterium;s__Magnetobacterium sp002753395 | 3713224 | 175  | 44.44 | 35197 | 94.24 | 3.18  |
| <i>Nitrospirae</i> bacterium MY-22*          | <i>Nitrospirae</i> | -               | -                                                                                                                                                            | -       | -    | -     | -     | -     | -     |
| <i>Nitrospirae</i> bacterium MY-23*          | <i>Nitrospirae</i> | -               | -                                                                                                                                                            | -       | -    | -     | -     | -     | -     |
| <i>Nitrospirae</i> bacterium MY-2*           | <i>Nitrospirae</i> | -               | -                                                                                                                                                            | -       | -    | -     | -     | -     | -     |
| <i>Ca. Magnetomonas</i>                      | <i>Nitrospirae</i> | GCA_004376055.1 | d__Bacteria;p__Nitrospirota;c__Thermodesulfovibrionia;                                                                                                       | 2314299 | 1154 | 42.13 | 3183  | 65.15 | 1.82  |

|                                              |                            |                 |                                                                                                              |         |      |       |        |       |       |  |
|----------------------------------------------|----------------------------|-----------------|--------------------------------------------------------------------------------------------------------------|---------|------|-------|--------|-------|-------|--|
| plexicatena LBB_01                           |                            |                 | o_Thermodesulfobivibrionales;<br>f_Magnetobacteriaceae;g__;s__                                               |         |      |       |        |       |       |  |
| Ca. Omniphilic bacterium<br>WOR_2 GWA2_45_18 | Ca. Omniphilic             | 2721755113      | d_Bacteria;p_Omniphilota;c_koll11;o_UBA10015;<br>f_kpj58rc;g_UBA10174;s_UBA10174 sp003528115                 | 2335743 | 24   | 46.36 | 133212 | 83.99 | 1.08  |  |
| Ca. Omniphilic bacterium<br>Cal1bin1         | Ca. Omniphilic             | GCA_002753745.1 | d_Bacteria;p_Omniphilota;c_koll11;o_UBA10015;<br>f_GCA-002753745;g_GCA-2753745;<br>s_GCA-2753745 sp002753745 | 2540141 | 240  | 49.55 | 15133  | 84.26 | 2.15  |  |
| Ca. Omniphilic bacterium<br>MBPbin6          | Ca. Omniphilic             | GCA_002753465.1 | d_Bacteria;p_Omniphilota;c_koll11;o_UBA10015;<br>f_GCA-002753745;g_GCA-2753465;<br>s_GCA-2753465 sp002753465 | 2181257 | 150  | 49.49 | 24179  | 68.40 | 2.15  |  |
| Ca. Omniphilic bacterium<br>WOR_2 GWC2_45_7  | Ca. Omniphilic             | 2708742630      | d_Bacteria;p_Omniphilota;c_koll11;o_UBA10015;<br>f_kpj58rc;g_UBA10174;s__                                    | 1236942 | 1352 | 45.74 | 1248   | 56.57 | 0.10  |  |
| Ca. Omniphilus magneticus<br>SKK-01          | Ca. Omniphilic             | 2636416185      | d_Bacteria;p_Omniphilota;c_koll11;o_UBA1560;<br>f__;g__;s__                                                  | 3103091 | 529  | 35.71 | 15515  | 96.17 | 46.77 |  |
| Latescibacteria bacterium<br>SCGC AAA252-B13 | Ca. Latescibacteria        | 2264867252      | d_Bacteria;p_Latescibacterota;c_Latescibacteria;<br>o_Latescibacterales;f_Latescibacteraceae;g__;s__         | 1759976 | 138  | 40.86 | 23078  | 43.99 | 0.00  |  |
| Syntrophaceae bacterium<br>MAG_21602_syn32   | <i>Deltaproteobacteria</i> | 3300021602      | d_Bacteria;p_Desulfobacterota;c_Syntrophia;<br>o_Syntrophales;f__;g__;s__                                    | 1798526 | 388  | 49.78 | 4890   | 38.98 | 8.48  |  |

\* For these organisms only MGC genes information exists

**Supplementary Table S1. Characteristics of MTB genomes used to create the MGC protein sequence database**

| Organism                                            | Taxonomy (GTDB)                                                                                                 |
|-----------------------------------------------------|-----------------------------------------------------------------------------------------------------------------|
| Ca. Hydrogenedentes bacterium<br>MAG_17963_hgd_111  | d__Bacteria;p__Hydrogenedentota;c__Hydrogenedentia;o__Hydrogenedentiales;f__g__;s__                             |
| Ca. Hydrogenedentes bacterium<br>MAG_17971_hgd_130  | d__Bacteria;p__Hydrogenedentota;c__Hydrogenedentia;o__Hydrogenedentiales;f__g__;s__                             |
| Deltaproteobacteria bacterium<br>MAG_00134_naph_006 | d__Bacteria;p__Desulfobacterota;c__Desulfobacteria;o__Desulfatiglandales;f__NaphS2;g__;s__                      |
| Deltaproteobacteria bacterium<br>MAG_00241_naph_010 | d__Bacteria;p__Desulfobacterota;c__Desulfobacteria;o__Desulfatiglandales;f__NaphS2;g__;s__                      |
| Deltaproteobacteria bacterium<br>MAG_00792_naph_016 | d__Bacteria;p__Desulfobacterota;c__Desulfobacteria;o__Desulfatiglandales;f__NaphS2;g__;s__                      |
| Deltaproteobacteria bacterium<br>MAG_09788_naph_37  | d__Bacteria;p__Desulfobacterota;c__Desulfobacteria;o__Desulfatiglandales;f__NaphS2;g__;s__                      |
| Deltaproteobacteria bacterium<br>MAG_15370_dsfb_81  | d__Bacteria;p__Desulfobacterota;c__Desulfobacteria;o__Desulfobacterales;f__4572-123;g__;s__                     |
| Deltaproteobacteria bacterium<br>MAG_17929_sntb_26  | d__Bacteria;p__Desulfobacterota;c__Syntrophobacteria;o__Syntrophobacterales;f__Syntrophobacteraceae;g__SbD1;s__ |
| Deltaproteobacteria bacterium<br>MAG_17996_sntb_20  | d__Bacteria;p__Desulfobacterota;c__Syntrophobacteria;o__Syntrophobacterales;f__Syntrophobacteraceae;g__SbD1;s__ |
| Deltaproteobacteria bacterium<br>MAG_22204_dsfv_001 | d__Bacteria;p__Desulfobacterota;c__Desulfobulbia;o__Desulfobulbales;f__Desulfurivibrionaceae;g__;s__            |
| Deltaproteobacteria bacterium<br>MAG_22309_dsfv_022 | d__Bacteria;p__Desulfobacterota;c__Desulfobulbia;o__Desulfobulbales;f__Desulfurivibrionaceae;<br>g__UBA2262;s__ |
| Gammaproteobacteria bacterium<br>MAG_00150_gam_010  | d__Bacteria;p__Proteobacteria;c__Gammaproteobacteria;o__GCA-2400775;f__;g__;s__                                 |
| Gammaproteobacteria bacterium<br>MAG_00160_gam_009  | d__Bacteria;p__Proteobacteria;c__Gammaproteobacteria;o__GCA-2400775;f__;g__;s__                                 |
| Gammaproteobacteria bacterium<br>MAG_00172_gam_018  | d__Bacteria;p__Proteobacteria;c__Gammaproteobacteria;o__GCA-2400775;f__;g__;s__                                 |
| Gammaproteobacteria bacterium<br>MAG_00188_gam_006  | d__Bacteria;p__Proteobacteria;c__Gammaproteobacteria;o__GCA-2400775;f__;g__;s__                                 |
| Gammaproteobacteria bacterium<br>MAG_00212_gam_1    | d__Bacteria;p__Proteobacteria;c__Gammaproteobacteria;o__GCA-2400775;f__;g__;s__                                 |
| Gammaproteobacteria bacterium<br>MAG_00215_gam_020  | d__Bacteria;p__Proteobacteria;c__Gammaproteobacteria;o__GCA-2400775;f__;g__;s__                                 |
| Magnetococcales bacterium<br>MAG_21055_mgc_1        | d__Bacteria;p__Proteobacteria;c__Magnetococcia;o__Magnetococcales;f__UBA8363;g__UBA8363;s__                     |
| Nitrospinae bacterium<br>MAG_09705_ntspn_70         | d__Bacteria;p__Nitrospinota;c__Nitrospina;o__Nitrospinales;f__Nitrospinaceae;g__UBA8687;s__                     |
| Nitrospirae bacterium<br>MAG_10313_ntr_31           | d__Bacteria;p__Nitrospirota;c__Thermodesulfovibrionia;o__Thermodesulfovibrionales;f__;g__;s__                   |
| Pelobacteraceae bacterium<br>MAG_21601_9_030        | d__Bacteria;p__Desulfuromonadota;c__Desulfuromonadia;o__Geobacterales;f__Pelobacteraceae;<br>g__UBA8499;s__     |

|                                                     |                                                                                                                                             |
|-----------------------------------------------------|---------------------------------------------------------------------------------------------------------------------------------------------|
| Pelobacteraceae bacterium<br>MAG_13126_9_058        | d__Bacteria;p__Desulfuromonadota;c__Desulfuromonadia;o__Geobacterales;f__Pelobacteraceae;<br>g__UBA8499;s__                                 |
| Pelobacteraceae bacterium<br>MAG_21600_9_004        | d__Bacteria;p__Desulfuromonadota;c__Desulfuromonadia;o__Geobacterales;f__Pelobacteraceae;<br>g__UBA8499;s__                                 |
| Planctomycetes bacterium<br>MAG_11118_pl_115        | d__Bacteria;p__Planctomycetota;c__Phycisphaerae;o__SG8-4;f__SG8-4;g__SG8-4;s__                                                              |
| Planctomycetes bacterium<br>MAG_17991_pl_60         | d__Bacteria;p__Planctomycetota;c__Phycisphaerae;o__SG8-4;f__SG8-4;g__s__                                                                    |
| Planctomycetes bacterium<br>MAG_18080_pl_157        | d__Bacteria;p__Planctomycetota;c__Phycisphaerae;o__SG8-4;f__SG8-4;g__s__                                                                    |
| Rhodospirillaceae bacterium<br>MAG_01419_mvb_30     | d__Bacteria;p__Proteobacteria;c__Alphaproteobacteria;o__Rhodospirillales_A;f__Magnetovibrionaceae;g__Magnetovibrio;s__<br>-                 |
| Rhodospirillaceae bacterium<br>MAG_04806_tlms_2     | d__Bacteria;p__Proteobacteria;c__Alphaproteobacteria;o__Rhodospirillales_B;f__Magnetospirillaceae;<br>g__Telmatospirillum;s__               |
| Rhodospirillaceae bacterium<br>MAG_05422_2-02_14    | d__Bacteria;p__Proteobacteria;c__Alphaproteobacteria;o__Rhodospirillales_A;<br>f__2-02-FULL-58-16;g__GCA-2686765;s__GCA-2686765 sp002686765 |
| Rhodospirillaceae bacterium<br>MAG_05596_2-02_51    | d__Bacteria;p__Proteobacteria;c__Alphaproteobacteria;o__Rhodospirillales_A;<br>f__2-02-FULL-58-16;g__GCA-2686765;s__GCA-2686765 sp002686765 |
| Rhodospirillaceae bacterium<br>MAG_06104_tlms_034   | d__Bacteria;p__Proteobacteria;c__Alphaproteobacteria;o__Rhodospirillales_B;<br>f__Magnetospirillaceae;g__s__                                |
| Rhodospirillaceae bacterium<br>MAG_22225_2-02_112   | d__Bacteria;p__Proteobacteria;c__Alphaproteobacteria;o__Rhodospirillales_A;<br>f__2-02-FULL-58-16;g__GCA-2686765;s__GCA-2686765 sp002686765 |
| <i>Ca. Omnitrphica</i> bacterium<br>SCGC AG-290-C17 | d__Bacteria;p__Omnitrophota;c__Omnitrophia;o__Omnitrophales;f__GWA2-52-8;g__s__                                                             |
| <i>Magnetovibrio</i> sp. ARS8                       | d__Bacteria;p__Proteobacteria;c__Alphaproteobacteria;o__Rhodospirillales_A;<br>f__2-02-FULL-58-16;g__GCA-2686765;s__GCA-2686765 sp002686765 |
| Elusimicrobia bacterium<br>NORP122                  | d__Bacteria;p__Elusimicrobiota;c__Elusimicrobia;o__UBA1565;f__UBA1565;<br>g__UBA1565;s__UBA1565 sp002401485                                 |
| Uncultured microorganism<br>SbSrfc.SA12.01.D19      | d__Bacteria;p__Desulfobacterota;c__Desulfobulbia;o__Desulfobulbales;f__YD12-FULL-57-12;g__s__                                               |
| Unclassified Nitrospina Bin 25                      | d__Bacteria;p__Nitrospinota;c__Nitrospina;o__Nitrospinales;f__g__s__                                                                        |
| Planctomycetes bacterium<br>SCGC JGI090-P21         | d__Bacteria;p__Planctomycetota;c__Phycisphaerae;o__UBA1845;f__g__s__                                                                        |

\* For these organisms only MGC genes information exists

**Supplementary Table S2.** Taxonomic assignments obtained from the Genome Taxonomy Database for the MAGS, SAGs, and genomes obtained in this study.

| IMG metagenome ID | Sampling place                                                                                                                              | Binned in this work | Number of obtained MAGs |
|-------------------|---------------------------------------------------------------------------------------------------------------------------------------------|---------------------|-------------------------|
| 3300000124        | Marine microbial communities from chronically polluted sediments in the Baltic Sea - site KBA sample SWE 12_21m                             | +                   | 85                      |
| 3300000126        | Marine microbial communities from chronically polluted sediments in the Baltic Sea - site KBB sample SWE 26_20.5m                           | +                   | 63                      |
| 3300000134        | Marine microbial communities from chronically polluted sediments in the Baltic Sea - site KBA sample SWE 07_21m                             | +                   | 36                      |
| 3300000150        | Marine microbial communities from expanding oxygen minimum zones in the Saanich Inlet - 48 08/11/10 120m                                    | +                   | 53                      |
| 3300000151        | Marine microbial communities from expanding oxygen minimum zones in the Saanich Inlet - 53 01/11/11 200m                                    | +                   | 62                      |
| 3300000154        | Marine microbial communities from expanding oxygen minimum zones in the Saanich Inlet - 47 07/07/10 150m                                    | +                   | 79                      |
| 3300000160        | Marine microbial communities from expanding oxygen minimum zones in the Saanich Inlet - 48 08/11/10 135m                                    | +                   | 55                      |
| 3300000164        | Marine microbial communities from expanding oxygen minimum zones in the Saanich Inlet - 39 11/10/09 200m                                    | +                   | 93                      |
| 3300000172        | Marine microbial communities from expanding oxygen minimum zones in the Saanich Inlet - 34 06/16/09 200m                                    | +                   | 80                      |
| 3300000188        | Marine microbial communities from expanding oxygen minimum zones in the Saanich Inlet - 60 08/10/11 150m                                    | +                   | 38                      |
| 3300000193        | Marine microbial communities from expanding oxygen minimum zones in the Saanich Inlet - 47 07/07/10 135m                                    | +                   | 72                      |
| 3300000201        | Marine microbial communities from expanding oxygen minimum zones in the Saanich Inlet - 54 02/08/11 135m                                    | +                   | 39                      |
| 3300000211        | Marine microbial communities from expanding oxygen minimum zones in the Saanich Inlet - 53 01/11/11 135m                                    | +                   | 56                      |
| 3300000212        | Marine microbial communities from expanding oxygen minimum zones in the Saanich Inlet - 47 07/07/10 120m                                    | +                   | 92                      |
| 3300000213        | Marine microbial communities from expanding oxygen minimum zones in Line P, North Pacific Ocean - sample_F_10_SI03_150                      | +                   | 66                      |
| 3300000214        | Marine microbial communities from expanding oxygen minimum zones in the Saanich Inlet - 54 02/08/11 200m                                    | +                   | 46                      |
| 3300000215        | Marine microbial communities from expanding oxygen minimum zones in the Saanich Inlet - 53 01/11/11 120m                                    | +                   | 75                      |
| 3300000216        | Marine microbial communities from expanding oxygen minimum zones in the Saanich Inlet - 53 01/11/11 150m                                    | +                   | 87                      |
| 3300000229        | Groundwater microbial communities from subsurface biofilms in sulfidic aquifer in Frasassi Gorge, Italy, sample from two redox zones-LI09_3 | +                   | 39                      |
| 3300000241        | Marine microbial communities from chronically polluted sediments in the Baltic Sea - site KBB sample SWE 21_20.5m                           | +                   | 74                      |
| 3300000792        | Marine microbial communities from chronically polluted sediments in the Baltic Sea - site KBA sample SWE 02_21m                             | +                   | 119                     |
| 3300001419        | Saline surface water microbial communities from Etoliko Lagoon, Greece - halocline water (15 m)                                             | +                   | 113                     |
| 3300001687        | Deep Marine Sediments WOR-3-8_10                                                                                                            | +                   | 147                     |
| 3300001751        | Marine sediment microbial communities from White Oak River estuary, North Carolina - WOR-2-30_32                                            | +                   | 88                      |

|            |                                                                                                                 |      |     |
|------------|-----------------------------------------------------------------------------------------------------------------|------|-----|
| 3300001752 | Marine sediment microbial communities from White Oak River estuary, North Carolina - WOR-1-36_30                | -*   | 0   |
| 3300001753 | Marine sediment microbial communities from White Oak River estuary, North Carolina - WOR-3-24_28                | +    | 173 |
| 3300001782 | Marine sediment microbial communities from White Oak River estuary, North Carolina - WOR_deep_samples           | +    | 172 |
| 3300001854 | Marine sediment microbial communities from White Oak River estuary, North Carolina - WOR-1-52-54                | +    | 228 |
| 3300002053 | Marine sediment microbial communities from White Oak River estuary, North Carolina - WOR_SMTZ                   | +    | 198 |
| 3300002231 | Marine sediment microbial communities from Santorini caldera mats, Greece - red mat                             | +    | 176 |
| 3300002529 | Soil microbial communities from Rifle, Colorado - Rifle CSP2_plank highO2_0.2                                   | +    | 465 |
| 3300003144 | Marine sediment microbial communities from deep seafloor - Sample from 18.6 mbsf                                | +    | 14  |
| 3300003492 | Marine microbial communities from expanding oxygen minimum zones in the Saanich Inlet - SI037_S4LV_200m_DNA     | -*** | 0   |
| 3300003496 | Marine microbial communities from expanding oxygen minimum zones in the Saanich Inlet - SI037_S3LV_200m_DNA     | -*** | 0   |
| 3300003582 | Marine microbial communities from expanding oxygen minimum zones in the Saanich Inlet - SI073_LV_10m_DNA        | -*** | 0   |
| 3300003590 | Marine microbial communities from expanding oxygen minimum zones in the Saanich Inlet - SI072_LV_200m_DNA       | -*** | 0   |
| 3300003593 | Marine microbial communities from expanding oxygen minimum zones in the Saanich Inlet - SI074_LV_100m_DNA       | -*** | 0   |
| 3300003594 | Marine microbial communities from expanding oxygen minimum zones in the Saanich Inlet - SI074_LV_10m_DNA        | -*** | 0   |
| 3300003595 | Marine microbial communities from expanding oxygen minimum zones in the Saanich Inlet - SI074_LV_200m_DNA       | -*** | 0   |
| 3300003599 | Marine microbial communities from expanding oxygen minimum zones in the Saanich Inlet - SI037_S3LV_10m_DNA      | -*** | 0   |
| 3300003615 | Marine microbial communities from expanding oxygen minimum zones in the Saanich Inlet - SI037_S3LV_110m_DNA     | -*** | 0   |
| 3300003894 | Marine microbial communities from the northern Gulf of Mexico hypoxic zone - Cultivation independent assessment | +    | 103 |
| 3300004109 | Marine microbial communities from expanding oxygen minimum zones in the Saanich Inlet - SI037_S2LV_150m_DNA     | -*** | 0   |
| 3300004111 | Marine microbial communities from expanding oxygen minimum zones in the Saanich Inlet - SI037_S2LV_200m_DNA     | -*** | 0   |
| 3300004273 | Marine microbial communities from expanding oxygen minimum zones in the Saanich Inlet - SI075_LV_DNA_135m       | -*** | 0   |
| 3300004274 | Marine microbial communities from expanding oxygen minimum zones in the Saanich Inlet - SI075_LV_DNA_120m       | -*** | 0   |
| 3300004276 | Marine microbial communities from expanding oxygen minimum zones in the Saanich Inlet - SI075_LV_DNA_165m       | -*** | 0   |
| 3300004277 | Marine microbial communities from expanding oxygen minimum zones in the Saanich Inlet - SI075_LV_DNA_200m       | -*** | 0   |
| 3300004278 | Marine microbial communities from expanding oxygen minimum zones in the Saanich Inlet - SI075_LV_DNA_150m       | -*** | 0   |
| 3300004774 | Freshwater microbial communities from Crystal Bog, Wisconsin, USA - MA5M                                        | +    | 64  |
| 3300004806 | Freshwater microbial communities from Crystal Bog, Wisconsin, USA - CBH12Aug08                                  | +    | 160 |
| 3300005346 | Saline sediment microbial community from Etoliko Lagoon, Greece                                                 | +    | 20  |
| 3300005408 | Marine microbial and viral communities from oxygen minimum zone, Eastern Pacific Ocean - ETNP201310SV72         | +    | 60  |
| 3300005422 | Marine microbial and viral communities from oxygen minimum zone, Eastern Pacific Ocean - ETNP201306SV43         | +    | 74  |

|            |                                                                                                                                                           |                        |     |
|------------|-----------------------------------------------------------------------------------------------------------------------------------------------------------|------------------------|-----|
| 3300005551 | Marine microbial and viral communities from oxygen minimum zone, Eastern Pacific Ocean - ETNP201302PF89A                                                  | +                      | 47  |
| 3300005592 | Marine microbial and viral communities from oxygen minimum zone, Eastern Pacific Ocean - ETNP201302SV89                                                   | +                      | 65  |
| 3300005596 | Marine microbial and viral communities from oxygen minimum zone, Eastern Pacific Ocean - ETNP201306PF43B                                                  | +                      | 63  |
| 3300005838 | Marine microbial communities from expanding oxygen minimum zones in the Saanich Inlet - SI037_S2LV_130m_DNA                                               | -***                   | 0   |
| 3300005919 | Saline lake microbial communities from Ace Lake, Antarctica - Antarctic Ace Lake Metagenome 02UKM                                                         | +                      | 117 |
| 3300005939 | Saline lake microbial communities from Ace Lake, Antarctica - Antarctic Ace Lake Metagenome 02UKX                                                         | +                      | 101 |
| 3300006104 | Freshwater microbial communities from Crystal Bog, Wisconsin, USA - CBH12Aug09.1                                                                          | +                      | 134 |
| 3300006113 | Freshwater microbial communities from Crystal Bog, Wisconsin, USA - CBH08Aug08                                                                            | +                      | 35  |
| 3300009149 | Deep subsurface microbial communities from Baltic Sea to uncover new lineages of life (NeLLi) - Landsort_02402 metaG                                      | +                      | 117 |
| 3300009150 | Deep subsurface microbial communities from South Atlantic Ocean to uncover new lineages of life (NeLLi) - Benguela_00093 metaG                            | +                      | 222 |
| 3300009175 | Freshwater lake bacterial and archeal communities from Alinen Mustajarvi, Finland, to study Microbial Dark Matter (Phase II) - Alinen Mustajarvi 5m metaG | +                      | 251 |
| 3300009444 | Hot spring microbial communities from Beatty, Nevada to study Microbial Dark Matter (Phase II) - OV2 TP3                                                  | +                      | 187 |
| 3300009488 | Deep subsurface microbial communities from Indian Ocean to uncover new lineages of life (NeLLi) - Sumatra_00607 metaG                                     | +                      | 156 |
| 3300009528 | Deep subsurface microbial communities from South Pacific Ocean to uncover new lineages of life (NeLLi) - Chile_00310 metaG                                | +                      | 197 |
| 3300009529 | Deep subsurface microbial communities from Black Sea to uncover new lineages of life (NeLLi) - Black_00105 metaG                                          | +                      | 205 |
| 3300009548 | Peatland microbial communities from Minnesota, USA, analyzing carbon cycling and trace gas fluxes - June2015DPH_6_100                                     | +                      | 66  |
| 3300009631 | Peatland microbial communities from Minnesota, USA, analyzing carbon cycling and trace gas fluxes - June2015DPH_10_100                                    | +                      | 38  |
| 3300009691 | Hot spring microbial communities from Beatty, Nevada to study Microbial Dark Matter (Phase II) - OV2 TP2                                                  | +                      | 127 |
| 3300009705 | Marine microbial communities from western Arctic Ocean - ArcticOcean_MG_CB8_128                                                                           | +                      | 219 |
| 3300009788 | Deep subsurface microbial communities from Indian Ocean to uncover new lineages of life (NeLLi) - Sumatra_00157 metaG                                     | +                      | 192 |
| 3300010313 | Hot spring microbial communities from South Africa to study Microbial Dark Matter (Phase II) - Sagole hot spring metaG                                    | +                      | 136 |
| 3300010341 | Bog forest soil microbial communities from Calvert Island, British Columbia, Canada - Bog Forest MetaG ECP23OM2                                           | +                      | 134 |
| 3300010883 | Western Arctic Ocean co-assembly                                                                                                                          | - data from 3300009705 | 0   |



|            |                                                                                                                                      |      |     |
|------------|--------------------------------------------------------------------------------------------------------------------------------------|------|-----|
| 3300011118 | Deep subsurface microbial communities from Aarhus Bay to uncover new lineages of life (NeLLi) - Aarhus_00045 metaG                   | +    | 282 |
| 3300013089 | Freshwater microbial communities from Powell Lake, British Columbia, Canada to study Microbial Dark Matter (Phase II) - PL_2010_330m | +    | 165 |
| 3300013098 | Subseafloor sediment microbial communities from Guaymas Basin, Gulf of California, Mexico - Guay11, Core 4567-28, 0-3 cm             | +    | 87  |
| 3300013101 | Subseafloor sediment microbial communities from Guaymas Basin, Gulf of California, Mexico - Guay4, Core 4569-4, 0-3 cm               | +    | 208 |
| 3300013126 | Freshwater microbial communities from Kabuno Bay, South-Kivu, Congo ? kab_022012_10m                                                 | +    | 275 |
| 3300013131 | Freshwater microbial communities from Kabuno Bay, South-Kivu, Congo ? kab_092012_10m                                                 | -*   | 0   |
| 3300013232 | Sediment microbial communities from Acid Mine Drainage holding pond in Pittsburgh, PA, USA                                           | +    | 228 |
| 3300014151 | Peatland microbial communities from Houghton, MN, USA - PEATcosm2014_Bin23_60_metaG                                                  | +    | 82  |
| 3300014152 | Peatland microbial communities from Houghton, MN, USA - PEATcosm2014_Bin11_60_metaG                                                  | +    | 96  |
| 3300014153 | Peatland microbial communities from Houghton, MN, USA - PEATcosm2014_Bin06_60_metaG                                                  | +    | 92  |
| 3300014158 | Peatland microbial communities from Houghton, MN, USA - PEATcosm2014_Bin02_60_metaG                                                  | -*   | 0   |
| 3300014159 | Peatland microbial communities from Houghton, MN, USA - PEATcosm2014_Bin10_60_metaG                                                  | +    | 113 |
| 3300014491 | Permafrost microbial communities from Stordalen Mire, Sweden - 612S2D metaG                                                          | +    | 168 |
| 3300014638 | Peatland microbial communities from Houghton, MN, USA - PEATcosm2014_Bin17_60_metaG                                                  | +    | 110 |
| 3300014654 | Peatland microbial communities from Houghton, MN, USA - PEATcosm2014_Bin06_10_metaG                                                  | +    | 149 |
| 3300014903 | Subseafloor sediment microbial communities from Guaymas Basin, Gulf of California, Mexico - Guay12, Core 4567-28, 21-24 cm           | +    | 134 |
| 3300015153 | Sorted cell/s from water in Cold Creek, Beatty, Nevada, USA - Omnitrophica bacterium SCGC_AG-290-C17                                 | -.** | 0   |
| 3300015370 | Groundwater microbial communities from the Aspo Hard Rock Laboratory (HRL) deep subsurface site, Sweden - OS_PC_MetaG                | +    | 238 |
| 3300017818 | Coastal salt marsh microbial communities from the Groves Creek Marsh, Skidaway Island, Georgia - 101401AT metaG (megahit assembly)   | +    | 249 |
| 3300017925 | Peatland microbial communities from SPRUCE experiment site at the Marcell Experimental Forest, Minnesota, USA - June2016WEW_8_40     | +    | 68  |
| 3300017929 | Peatland microbial communities from SPRUCE experiment site at the Marcell Experimental Forest, Minnesota, USA - June2016WEW_4_100    | +    | 111 |
| 3300017963 | Hypersaline lake sediment archaeal communities from the Salton Sea, California, USA - SS_3_D_1 metaG                                 | +    | 170 |
| 3300017971 | Hypersaline lake sediment archaeal communities from the Salton Sea, California, USA - SS_3_D_2 metaG                                 | +    | 207 |
| 3300017985 | Coastal salt marsh microbial communities from the Groves Creek Marsh, Skidaway Island, Georgia - 101412BT metaG (megahit assembly)   | +    | 220 |

|            |                                                                                                                                          |    |     |
|------------|------------------------------------------------------------------------------------------------------------------------------------------|----|-----|
| 3300017987 | Hypersaline lake sediment archaeal communities from the Salton Sea, California, USA - SS_1_MS_1 metaG                                    | +  | 238 |
| 3300017991 | Hypersaline lake sediment archaeal communities from the Salton Sea, California, USA - SS_1_D_2 metaG                                     | +  | 218 |
| 3300017996 | Peatland microbial communities from SPRUCE experiment site at the Marcell Experimental Forest, Minnesota, USA - June2016WEW_21_40        | +  | 66  |
| 3300018002 | Peatland microbial communities from SPRUCE experiment site at the Marcell Experimental Forest, Minnesota, USA - June2016WEW_13_40        | +  | 59  |
| 3300018004 | Peatland microbial communities from SPRUCE experiment site at the Marcell Experimental Forest, Minnesota, USA - June2016WEW_11_100       | +  | 84  |
| 3300018016 | Peatland microbial communities from SPRUCE experiment site at the Marcell Experimental Forest, Minnesota, USA - June2016WEW_19_40        | +  | 88  |
| 3300018019 | Peatland microbial communities from SPRUCE experiment site at the Marcell Experimental Forest, Minnesota, USA - June2016WEW_16_150       | +  | 84  |
| 3300018023 | Peatland microbial communities from SPRUCE experiment site at the Marcell Experimental Forest, Minnesota, USA - June2016WEW_7_100        | +  | 105 |
| 3300018024 | Peatland microbial communities from SPRUCE experiment site at the Marcell Experimental Forest, Minnesota, USA - June2016WEW_19_100       | +  | 142 |
| 3300018025 | Peatland microbial communities from SPRUCE experiment site at the Marcell Experimental Forest, Minnesota, USA - June2016WEW_20_100       | +  | 101 |
| 3300018026 | Peatland microbial communities from SPRUCE experiment site at the Marcell Experimental Forest, Minnesota, USA - June2016WEW_8_100        | +  | 93  |
| 3300018033 | Peatland microbial communities from SPRUCE experiment site at the Marcell Experimental Forest, Minnesota, USA - June2016WEW_13_10        | +  | 107 |
| 3300018080 | Hypersaline lake sediment archaeal communities from the Salton Sea, California, USA - SS_1_D_1 metaG                                     | +  | 270 |
| 3300018426 | Coastal salt marsh microbial communities from the Groves Creek Marsh, Skidaway Island, Georgia - 101402AT metaG (megahit assembly)       | +  | 250 |
| 3300019082 | Peatland microbial communities from SPRUCE experiment site at the Marcell Experimental Forest, Minnesota, USA - June2016WEW_6_40         | -* | 0   |
| 3300020158 | Anoxic zone freshwater microbial communities from boreal shield lake in IISD Experimental Lakes Area, Ontario, Canada - Jun2016-L227-6m  | +  | 97  |
| 3300020164 | Anoxic zone freshwater microbial communities from boreal shield lake in IISD Experimental Lakes Area, Ontario, Canada - Jun2016-L304-6m  | +  | 159 |
| 3300021055 | Subsurface sediment microbial communities from Mancos shale, Colorado, United States - Mancos C3                                         | +  | 17  |
| 3300021070 | Anoxic zone freshwater microbial communities from boreal shield lake in IISD Experimental Lakes Area, Ontario, Canada - Sep2016-L442-13m | +  | 157 |
| 3300021071 | Anoxic zone freshwater microbial communities from boreal shield lake in IISD Experimental Lakes Area, Ontario, Canada - Sep2016-L442-17m | +  | 90  |

|                   |                                                                                                                                                       |                        |              |
|-------------------|-------------------------------------------------------------------------------------------------------------------------------------------------------|------------------------|--------------|
| 3300021072        | Anoxic zone freshwater microbial communities from boreal shield lake in IISD Experimental Lakes Area, Ontario, Canada - Sep2016-L442-15m              | +                      | 100          |
| 3300021074        | Anoxic zone freshwater microbial communities from boreal shield lake in IISD Experimental Lakes Area, Ontario, Canada - Jun2016-L442-17m              | +                      | 169          |
| 3300021075        | Anoxic zone freshwater microbial communities from boreal shield lake in IISD Experimental Lakes Area, Ontario, Canada - Sep2016-L373-20m              | +                      | 153          |
| 3300021354        | Anoxic zone freshwater microbial communities from boreal shield lake in IISD Experimental Lakes Area, Ontario, Canada - Jun2016-L221-5m               | +                      | 199          |
| 3300021600        | Anoxic zone freshwater microbial communities from boreal shield lake in IISD Experimental Lakes Area, Ontario, Canada - Sep2016-L626-11m              | +                      | 122          |
| 3300021601        | Anoxic zone freshwater microbial communities from boreal shield lake in IISD Experimental Lakes Area, Ontario, Canada - Sep2016-L224-21m              | +                      | 136          |
| 3300021602        | Anoxic zone freshwater microbial communities from boreal shield lake in IISD Experimental Lakes Area, Ontario, Canada - Sep2016-L222-5m               | +                      | 262          |
| 3300022116        | Sorted cell/s from Aspo Hard Rock Laboratory (HRL) deep subsurface site groundwater, Oskarshamn, Sweden - uncultured microorganism SbSrfc.SA12.01.D19 | -**                    | 0            |
| 3300022204        | Sediment microbial communities from San Francisco Bay, California, United States - SF_Jul11_sed_USGS_8_1                                              | +                      | 187          |
| 3300022214        | Sediment microbial communities from San Francisco Bay, California, United States - SF_Jan12_sed_USGS_4_1                                              | +                      | 143          |
| 3300022217        | Sediment microbial communities from San Francisco Bay, California, United States - SF_May12_sed_USGS_24                                               | +                      | 101          |
| 3300022223        | Sediment microbial communities from San Francisco Bay, California, United States - SF_Oct11_sed_USGS_8_1                                              | +                      | 234          |
| 3300022225        | Marine microbial and viral communities from oxygen minimum zone, Eastern Pacific Ocean - ETNP2014_SV_400_PacBio MetaG (Illumina Assembly)             | +                      | 373          |
| 3300022309        | Sediment microbial communities from San Francisco Bay, California, United States - SF_May12_sed_USGS_4_1                                              | +                      | 159          |
| 3300022553        | Powell_combined assembly                                                                                                                              | - data from 3300013089 | 0            |
| 3300022555        | Alinen_combined assembly                                                                                                                              | - data from 3300009175 | 0            |
| <b>Total MAGs</b> |                                                                                                                                                       |                        | <b>14688</b> |
| _*                | No binning results were obtained                                                                                                                      |                        |              |
| **                | Sorted cells, no needed to be binned                                                                                                                  |                        |              |
| ***               | Metagenomes were not binned because samples were obtained from one place and contained 100% identical MamK sequences                                  |                        |              |

**Supplementary Table S3.** Metagenomes detected to contain *mamK* genes, and the number of MAGs obtained after metagenome binning.

| Genome ID  | Scaffold ID                     | Gene_oid                                                | Scaffold Length (bp) | Scaffold GC % | Scaffold Read Depth | Ecosystem Category | Ecosystem Subtype | Ecosystem Type |
|------------|---------------------------------|---------------------------------------------------------|----------------------|---------------|---------------------|--------------------|-------------------|----------------|
| 3300000124 | BS_KBA_SWE12_21mDRAFT_c10006010 | 3300000124 assembled<br>BS_KBA_SWE12_21mDRAFT_100060105 | 4170                 | 0.41          | 23                  | Aquatic            | Wetlands          | Marine         |
| 3300000124 | BS_KBA_SWE12_21mDRAFT_c1000022  | 3300000124 assembled<br>BS_KBA_SWE12_21mDRAFT_100002221 | 50993                | 0.52          | 47                  | Aquatic            | Wetlands          | Marine         |
| 3300000126 | BS_KBB_SWE26_205mDRAFT_c1003348 | 3300000126 assembled<br>BS_KBB_SWE26_205mDRAFT_10033483 | 2958                 | 0.4           | 39                  | Aquatic            | Wetlands          | Marine         |
| 3300000126 | BS_KBB_SWE26_205mDRAFT_c1016174 | 3300000126 assembled<br>BS_KBB_SWE26_205mDRAFT_10161741 | 1238                 | 0.51          | 43                  | Aquatic            | Wetlands          | Marine         |
| 3300000134 | BS_KBA_SWE07_21mDRAFT_c1000050  | 3300000134 assembled<br>BS_KBA_SWE07_21mDRAFT_100005014 | 14693                | 0.49          | 24                  | Aquatic            | Wetlands          | Marine         |
| 3300000150 | SI48aug10_120mDRAFT_c1000041    | 3300000150 assembled<br>SI48aug10_120mDRAFT_100004115   | 39017                | 0.48          | 53                  | Aquatic            | Intertidal zone   | Marine         |
| 3300000151 | SI53jan11_200mDRAFT_c1000626    | 3300000151 assembled<br>SI53jan11_200mDRAFT_100062617   | 18423                | 0.48          | 128                 | Aquatic            | Intertidal zone   | Marine         |
| 3300000151 | SI53jan11_200mDRAFT_c1001635    | 3300000151 assembled<br>SI53jan11_200mDRAFT_10016355    | 9965                 | 0.5           | 102                 | Aquatic            | Intertidal zone   | Marine         |
| 3300000154 | SI47jul10_150mDRAFT_c1000105    | 3300000154 assembled<br>SI47jul10_150mDRAFT_100010517   | 46665                | 0.48          | 62                  | Aquatic            | Intertidal zone   | Marine         |
| 3300000154 | SI47jul10_150mDRAFT_c1008647    | 3300000154 assembled<br>SI47jul10_150mDRAFT_10086472    | 3064                 | 0.46          | 42                  | Aquatic            | Intertidal zone   | Marine         |
| 3300000160 | SI48aug10_135mDRAFT_c1000085    | 3300000160 assembled<br>SI48aug10_135mDRAFT_100008525   | 40601                | 0.48          | 76                  | Aquatic            | Intertidal zone   | Marine         |
| 3300000164 | SI39no09_200mDRAFT_c1002767     | 3300000164 assembled<br>SI39no09_200mDRAFT_10027676     | 6943                 | 0.46          | 42                  | Aquatic            | Intertidal zone   | Marine         |
| 3300000164 | SI39no09_200mDRAFT_c1009836     | 3300000164 assembled<br>SI39no09_200mDRAFT_10098362     | 3069                 | 0.46          | 44                  | Aquatic            | Intertidal zone   | Marine         |
| 3300000172 | SI34jun09_200mDRAFT_c1000137    | 3300000172 assembled<br>SI34jun09_200mDRAFT_100013717   | 41737                | 0.48          | 93                  | Aquatic            | Intertidal zone   | Marine         |
| 3300000174 | SI60aug11_200mDRAFT_c1000053    | 3300000174 assembled<br>SI60aug11_200mDRAFT_100005332   | 69464                | 0.48          | 89                  | Aquatic            | Intertidal zone   | Marine         |
| 3300000174 | SI60aug11_200mDRAFT_c1007538    | 3300000174 assembled<br>SI60aug11_200mDRAFT_10075385    | 3183                 | 0.46          | 14                  | Aquatic            | Intertidal zone   | Marine         |

|            |                                 |                                                           |       |      |     |         |                 |                                      |
|------------|---------------------------------|-----------------------------------------------------------|-------|------|-----|---------|-----------------|--------------------------------------|
| 3300000188 | SI60aug11_150mDRAFT_c1000208    | 3300000188 assembled<br>SI60aug11_150mDRAFT_10002087      | 16603 | 0.48 | 82  | Aquatic | Intertidal zone | Marine                               |
| 3300000193 | SI47jul10_135mDRAFT_c1000134    | 3300000193 assembled<br>SI47jul10_135mDRAFT_100013417     | 41676 | 0.48 | 54  | Aquatic | Intertidal zone | Marine                               |
| 3300000201 | SI54feb11_135mDRAFT_c1009650    | 3300000201 assembled<br>SI54feb11_135mDRAFT_10096502      | 1253  | 0.46 | 39  | Aquatic | Intertidal zone | Marine                               |
| 3300000211 | SI53jan11_135mDRAFT_c1011890    | 3300000211 assembled<br>SI53jan11_135mDRAFT_10118902      | 1525  | 0.45 | 15  | Aquatic | Intertidal zone | Marine                               |
| 3300000212 | SI47jul10_120mDRAFT_c1002535    | 3300000212 assembled<br>SI47jul10_120mDRAFT_10025357      | 6779  | 0.46 | 22  | Aquatic | Intertidal zone | Marine                               |
| 3300000213 | LP_F_10_SI03_150DRAFT_c1002574  | 3300000213 assembled<br>LP_F_10_SI03_150DRAFT_10025745    | 5493  | 0.46 | 24  | Aquatic | Oceanic         | Marine                               |
| 3300000214 | SI54feb11_200mDRAFT_c1000740    | 3300000214 assembled<br>SI54feb11_200mDRAFT_10007407      | 10174 | 0.47 | 50  | Aquatic | Intertidal zone | Marine                               |
| 3300000214 | SI54feb11_200mDRAFT_c1004724    | 3300000214 assembled<br>SI54feb11_200mDRAFT_10047242      | 3047  | 0.46 | 34  | Aquatic | Intertidal zone | Marine                               |
| 3300000215 | SI53jan11_120mDRAFT_c1000197    | 3300000215 assembled<br>SI53jan11_120mDRAFT_100019717     | 31918 | 0.48 | 34  | Aquatic | Intertidal zone | Marine                               |
| 3300000216 | SI53jan11_150mDRAFT_c1000132    | 3300000216 assembled<br>SI53jan11_150mDRAFT_100013217     | 46665 | 0.48 | 107 | Aquatic | Intertidal zone | Marine                               |
| 3300000216 | SI53jan11_150mDRAFT_c1002381    | 3300000216 assembled<br>SI53jan11_150mDRAFT_10023814      | 8217  | 0.5  | 78  | Aquatic | Intertidal zone | Marine                               |
| 3300000229 | TB_LI09_3DRAFT_1003818          | 3300000229 assembled TB_LI09_3DRAFT_10038186              | 4036  | 0.42 | 90  | Aquatic | Groundwater     | Freshwater                           |
| 3300000241 | BS_KBA_SWE21_205mDRAFT_10000112 | 3300000241 assembled<br>BS_KBA_SWE21_205mDRAFT_1000011211 | 24445 | 0.51 | 43  | Aquatic | Wetlands        | Marine                               |
| 3300000792 | BS_KBA_SWE02_21mDRAFT_10000792  | 3300000792 assembled<br>BS_KBA_SWE02_21mDRAFT_100007925   | 11970 | 0.41 | 30  | Aquatic | Intertidal zone | Marine                               |
| 3300000792 | BS_KBA_SWE02_21mDRAFT_10000057  | 3300000792 assembled<br>BS_KBA_SWE02_21mDRAFT_1000005719  | 34622 | 0.52 | 57  | Aquatic | Intertidal zone | Marine                               |
| 3300001419 | JGI11705J14877_10007165         | 3300001419 assembled JGI11705J14877_100071654             | 5184  | 0.4  | 24  | Aquatic | Saline          | Non-marine<br>Saline and<br>Alkaline |
| 3300001419 | JGI11705J14877_10001955         | 3300001419 assembled JGI11705J14877_100019552             | 11420 | 0.54 | 52  | Aquatic | Saline          | Non-marine<br>Saline and<br>Alkaline |

|            |                         |                                                |       |      |    |         |                    |                                |
|------------|-------------------------|------------------------------------------------|-------|------|----|---------|--------------------|--------------------------------|
| 3300001419 | JGI11705J14877_10006387 | 3300001419 assembled JGI11705J14877_100063875  | 5557  | 0.55 | 54 | Aquatic | Saline             | Non-marine Saline and Alkaline |
| 3300001457 | JGI10211J14876_10000097 | 3300001457 assembled JGI10211J14876_1000009714 | 31606 | 0.47 | 64 | Aquatic | Saline             | Non-marine Saline and Alkaline |
| 3300001457 | JGI10211J14876_10000325 | 3300001457 assembled JGI10211J14876_1000032526 | 20233 | 0.45 | 61 | Aquatic | Saline             | Non-marine Saline and Alkaline |
| 3300001457 | JGI10211J14876_10001919 | 3300001457 assembled JGI10211J14876_1000191912 | 9038  | 0.43 | 54 | Aquatic | Saline             | Non-marine Saline and Alkaline |
| 3300001687 | WOR8_10023872           | 3300001687 assembled WOR8_100238721            | 6643  | 0.48 | 1  | Aquatic | Oceanic            | Marine                         |
| 3300001751 | JGI2172J19969_10045593  | 3300001751 assembled JGI2172J19969_100455931   | 1470  | 0.5  | 19 | Aquatic | Oceanic            | Marine                         |
| 3300001751 | JGI2172J19969_10006683  | 3300001751 assembled JGI2172J19969_100066832   | 4899  | 0.45 | 34 | Aquatic | Oceanic            | Marine                         |
| 3300001752 | JGI2173J19968_10033383  | 3300001752 assembled JGI2173J19968_100333832   | 1729  | 0.47 | 35 | Aquatic | Oceanic            | Marine                         |
| 3300001753 | JGI2171J19970_10006814  | 3300001753 assembled JGI2171J19970_100068149   | 5837  | 0.45 | 35 | Aquatic | Oceanic            | Marine                         |
| 3300001753 | JGI2171J19970_10034696  | 3300001753 assembled JGI2171J19970_100346962   | 2081  | 0.47 | 18 | Aquatic | Oceanic            | Marine                         |
| 3300001782 | WOR52_10036001          | 3300001782 assembled WOR52_100360017           | 6686  | 0.4  | 1  | Aquatic | Intertidal zone    | Marine                         |
| 3300001782 | WOR52_10005260          | 3300001782 assembled WOR52_1000526019          | 18039 | 0.45 | 1  | Aquatic | Intertidal zone    | Marine                         |
| 3300001854 | JGI24422J19971_10215508 | 3300001854 assembled JGI24422J19971_102155081  | 823   | 0.54 | 20 | Aquatic | Oceanic            | Marine                         |
| 3300001854 | JGI24422J19971_10010471 | 3300001854 assembled JGI24422J19971_100104711  | 5723  | 0.46 | 63 | Aquatic | Oceanic            | Marine                         |
| 3300001854 | JGI24422J19971_10047837 | 3300001854 assembled JGI24422J19971_100478372  | 2446  | 0.47 | 44 | Aquatic | Oceanic            | Marine                         |
| 3300002053 | SMTZ23_10026417         | 3300002053 assembled SMTZ23_100264174          | 8092  | 0.48 | 1  | Aquatic | Intertidal zone    | Marine                         |
| 3300002053 | SMTZ23_10016270         | 3300002053 assembled SMTZ23_100162706          | 10586 | 0.41 | 1  | Aquatic | Intertidal zone    | Marine                         |
| 3300002053 | SMTZ23_10024145         | 3300002053 assembled SMTZ23_100241451          | 19124 | 0.48 | 1  | Aquatic | Intertidal zone    | Marine                         |
| 3300002053 | SMTZ23_10053527         | 3300002053 assembled SMTZ23_100535279          | 5364  | 0.47 | 1  | Aquatic | Intertidal zone    | Marine                         |
| 3300002053 | SMTZ23_10062872         | 3300002053 assembled SMTZ23_100628727          | 10954 | 0.47 | 1  | Aquatic | Intertidal zone    | Marine                         |
| 3300002231 | KVRMV2_100013668        | 3300002231 assembled KVRMV2_1000136681         | 2158  | 0.46 | 14 | Aquatic | Hydrothermal vents | Marine                         |
| 3300002231 | KVRMV2_100490840        | 3300002231 assembled KVRMV2_1004908401         | 2681  | 0.43 | 7  | Aquatic | Hydrothermal vents | Marine                         |
| 3300002231 | KVRMV2_100041118        | 3300002231 assembled KVRMV2_1000411182         | 8860  | 0.48 | 10 | Aquatic | Hydrothermal vents | Marine                         |
| 3300002231 | KVRMV2_100038070        | 3300002231 assembled KVRMV2_1000380704         | 16112 | 0.61 | 14 | Aquatic | Hydrothermal vents | Marine                         |
| 3300002231 | KVRMV2_101240214        | 3300002231 assembled KVRMV2_1012402141         | 1445  | 0.46 | 7  | Aquatic | Hydrothermal vents | Marine                         |

|            |                         |                                                |       |      |     |             |                 |                                |
|------------|-------------------------|------------------------------------------------|-------|------|-----|-------------|-----------------|--------------------------------|
| 3300002466 | JGI10211J34971_10000686 | 3300002466 assembled JGI10211J34971_1000068612 | 28102 | 0.46 | 89  | Aquatic     | Saline          | Non-marine Saline and Alkaline |
| 3300002466 | JGI10211J34971_10000961 | 3300002466 assembled JGI10211J34971_1000096121 | 23951 | 0.54 | 63  | Aquatic     | Saline          | Non-marine Saline and Alkaline |
| 3300002466 | JGI10211J34971_10000961 | 3300002466 assembled JGI10211J34971_100009615  | 23951 | 0.54 | 63  | Aquatic     | Saline          | Non-marine Saline and Alkaline |
| 3300002466 | JGI10211J34971_10001361 | 3300002466 assembled JGI10211J34971_1000136125 | 20232 | 0.45 | 83  | Aquatic     | Saline          | Non-marine Saline and Alkaline |
| 3300002466 | JGI10211J34971_10003099 | 3300002466 assembled JGI10211J34971_100030994  | 13387 | 0.45 | 70  | Aquatic     | Saline          | Non-marine Saline and Alkaline |
| 3300002466 | JGI10211J34971_10011232 | 3300002466 assembled JGI10211J34971_100112324  | 6601  | 0.4  | 28  | Aquatic     | Saline          | Non-marine Saline and Alkaline |
| 3300002529 | C687J35504_10005579     | 3300002529 assembled C687J35504_1000557911     | 7848  | 0.43 | 25  | Terrestrial | Loam            | Soil                           |
| 3300003144 | Ga0052244_1005653       | 3300003144 assembled Ga0052244_10056532        | 1461  | 0.45 | 1   | Aquatic     | Neritic zone    | Marine                         |
| 3300003492 | JGI26245J51145_1000097  | 3300003492 assembled JGI26245J51145_100009717  | 56481 | 0.48 | 32  | Aquatic     | Intertidal zone | Marine                         |
| 3300003492 | JGI26245J51145_1000691  | 3300003492 assembled JGI26245J51145_10006915   | 19094 | 0.49 | 39  | Aquatic     | Intertidal zone | Marine                         |
| 3300003496 | JGI26241J51128_1000792  | 3300003496 assembled JGI26241J51128_10007925   | 19114 | 0.49 | 50  | Aquatic     | Intertidal zone | Marine                         |
| 3300003496 | JGI26241J51128_1000956  | 3300003496 assembled JGI26241J51128_10009561   | 16657 | 0.48 | 42  | Aquatic     | Intertidal zone | Marine                         |
| 3300003582 | JGI26252J51714_1000163  | 3300003582 assembled JGI26252J51714_10001633   | 44691 | 0.48 | 35  | Aquatic     | Intertidal zone | Marine                         |
| 3300003582 | JGI26252J51714_1004880  | 3300003582 assembled JGI26252J51714_10048802   | 4109  | 0.48 | 37  | Aquatic     | Intertidal zone | Marine                         |
| 3300003590 | JGI26251J51716_1000099  | 3300003590 assembled JGI26251J51716_100009917  | 43480 | 0.48 | 91  | Aquatic     | Intertidal zone | Marine                         |
| 3300003590 | JGI26251J51716_1000679  | 3300003590 assembled JGI26251J51716_10006794   | 9944  | 0.5  | 109 | Aquatic     | Intertidal zone | Marine                         |
| 3300003593 | JGI26259J51720_1000060  | 3300003593 assembled JGI26259J51720_100006033  | 56481 | 0.48 | 49  | Aquatic     | Intertidal zone | Marine                         |
| 3300003593 | JGI26259J51720_1000956  | 3300003593 assembled JGI26259J51720_10009564   | 9944  | 0.5  | 35  | Aquatic     | Intertidal zone | Marine                         |
| 3300003594 | JGI26258J51719_1001151  | 3300003594 assembled JGI26258J51719_10011515   | 9243  | 0.5  | 26  | Aquatic     | Intertidal zone | Marine                         |
| 3300003595 | JGI26263J51726_1016230  | 3300003595 assembled JGI26263J51726_10162301   | 1725  | 0.44 | 13  | Aquatic     | Intertidal zone | Marine                         |
| 3300003599 | JGI26270J51728_1000102  | 3300003599 assembled JGI26270J51728_100010217  | 56481 | 0.48 | 79  | Aquatic     | Intertidal zone | Marine                         |
| 3300003599 | JGI26270J51728_1000479  | 3300003599 assembled JGI26270J51728_100047919  | 19074 | 0.49 | 57  | Aquatic     | Intertidal zone | Marine                         |
| 3300003600 | JGI26272J51733_1000094  | 3300003600 assembled JGI26272J51733_100009417  | 56481 | 0.48 | 40  | Aquatic     | Intertidal zone | Marine                         |
| 3300003600 | JGI26272J51733_1000482  | 3300003600 assembled JGI26272J51733_100048219  | 20690 | 0.49 | 151 | Aquatic     | Intertidal zone | Marine                         |
| 3300003615 | JGI26271J51732_1000447  | 3300003615 assembled JGI26271J51732_10004473   | 19331 | 0.48 | 26  | Aquatic     | Intertidal zone | Marine                         |
| 3300003615 | JGI26271J51732_1000457  | 3300003615 assembled JGI26271J51732_10004575   | 18974 | 0.49 | 27  | Aquatic     | Intertidal zone | Marine                         |
| 3300003615 | JGI26271J51732_1001110  | 3300003615 assembled JGI26271J51732_10011104   | 9874  | 0.5  | 20  | Aquatic     | Intertidal zone | Marine                         |

|            |                    |                                           |       |      |    |         |                 |                                |
|------------|--------------------|-------------------------------------------|-------|------|----|---------|-----------------|--------------------------------|
| 3300003894 | Ga0063241_1001009  | 3300003894 assembled Ga0063241_100100925  | 25922 | 0.41 | 1  | Aquatic | Coastal         | Marine                         |
| 3300004109 | Ga0008650_1005762  | 3300004109 assembled Ga0008650_10057622   | 4165  | 0.45 | 23 | Aquatic | Intertidal zone | Marine                         |
| 3300004109 | Ga0008650_1086599  | 3300004109 assembled Ga0008650_10865992   | 846   | 0.46 | 15 | Aquatic | Intertidal zone | Marine                         |
| 3300004111 | Ga0008651_10000830 | 3300004111 assembled Ga0008651_100008303  | 18436 | 0.48 | 24 | Aquatic | Intertidal zone | Marine                         |
| 3300004111 | Ga0008651_10002812 | 3300004111 assembled Ga0008651_100028127  | 9438  | 0.5  | 17 | Aquatic | Intertidal zone | Marine                         |
| 3300004273 | Ga0066608_1000159  | 3300004273 assembled Ga0066608_100015918  | 43499 | 0.48 | 35 | Aquatic | _               | Marine                         |
| 3300004273 | Ga0066608_1000766  | 3300004273 assembled Ga0066608_10007664   | 18514 | 0.49 | 33 | Aquatic | _               | Marine                         |
| 3300004274 | Ga0066607_1000662  | 3300004274 assembled Ga0066607_100066218  | 18442 | 0.48 | 49 | Aquatic | _               | Marine                         |
| 3300004274 | Ga0066607_1001642  | 3300004274 assembled Ga0066607_10016424   | 9963  | 0.5  | 32 | Aquatic | _               | Marine                         |
| 3300004276 | Ga0066610_10000168 | 3300004276 assembled Ga0066610_1000016818 | 46749 | 0.48 | 18 | Aquatic | _               | Marine                         |
| 3300004276 | Ga0066610_10002848 | 3300004276 assembled Ga0066610_100028481  | 9090  | 0.51 | 9  | Aquatic | _               | Marine                         |
| 3300004277 | Ga0066611_10000780 | 3300004277 assembled Ga0066611_1000078018 | 18442 | 0.48 | 23 | Aquatic | _               | Marine                         |
| 3300004277 | Ga0066611_10002212 | 3300004277 assembled Ga0066611_100022127  | 10028 | 0.5  | 13 | Aquatic | _               | Marine                         |
| 3300004278 | Ga0066609_10000109 | 3300004278 assembled Ga0066609_1000010917 | 56476 | 0.48 | 21 | Aquatic | _               | Marine                         |
| 3300004278 | Ga0066609_10000840 | 3300004278 assembled Ga0066609_1000084019 | 19214 | 0.49 | 12 | Aquatic | _               | Marine                         |
| 3300004774 | Ga0007794_10009072 | 3300004774 assembled Ga0007794_100090723  | 2985  | 0.41 | 11 | Aquatic | Lentic          | Freshwater                     |
| 3300004806 | Ga0007854_10048618 | 3300004806 assembled Ga0007854_100486182  | 2113  | 0.63 | 5  | Aquatic | Lentic          | Freshwater                     |
| 3300004806 | Ga0007854_10008257 | 3300004806 assembled Ga0007854_100082575  | 5996  | 0.61 | 8  | Aquatic | Lentic          | Freshwater                     |
| 3300005346 | Ga0074242_10791903 | 3300005346 assembled Ga0074242_107919032  | 2721  | 0.5  | 1  | Aquatic | Saline          | Non-marine Saline and Alkaline |
| 3300005346 | Ga0074242_11278538 | 3300005346 assembled Ga0074242_112785385  | 4555  | 0.49 | 1  | Aquatic | Saline          | Non-marine Saline and Alkaline |
| 3300005408 | Ga0066848_10014278 | 3300005408 assembled Ga0066848_100142782  | 2302  | 0.61 | 7  | Aquatic | Oceanic         | Marine                         |
| 3300005422 | Ga0066829_10009190 | 3300005422 assembled Ga0066829_100091902  | 3263  | 0.61 | 14 | Aquatic | Oceanic         | Marine                         |
| 3300005551 | Ga0066843_10044423 | 3300005551 assembled Ga0066843_100444231  | 1346  | 0.61 | 8  | Aquatic | Oceanic         | Marine                         |
| 3300005592 | Ga0066838_10027011 | 3300005592 assembled Ga0066838_100270112  | 1646  | 0.61 | 6  | Aquatic | Oceanic         | Marine                         |
| 3300005596 | Ga0066834_10003058 | 3300005596 assembled Ga0066834_100030587  | 7020  | 0.61 | 9  | Aquatic | Oceanic         | Marine                         |
| 3300005838 | Ga0008649_10001461 | 3300005838 assembled Ga0008649_1000146118 | 18559 | 0.48 | 13 | Aquatic | Intertidal zone | Marine                         |
| 3300005919 | Ga0075114_10009698 | 3300005919 assembled Ga0075114_100096982  | 4293  | 0.39 | 8  | Aquatic | Saline          | Non-marine Saline and Alkaline |
| 3300005939 | Ga0075123_10072329 | 3300005939 assembled Ga0075123_100723292  | 1342  | 0.42 | 6  | Aquatic | Saline          | Non-marine Saline and Alkaline |



|            |                    |                                           |       |      |    |             |              |                 |
|------------|--------------------|-------------------------------------------|-------|------|----|-------------|--------------|-----------------|
| 3300006104 | Ga0007882_10003798 | 3300006104 assembled Ga0007882_100037985  | 8249  | 0.67 | 11 | Aquatic     | Lentic       | Freshwater      |
| 3300006113 | Ga0007858_1021714  | 3300006113 assembled Ga0007858_10217141   | 1466  | 0.59 | 4  | Aquatic     | Lentic       | Freshwater      |
| 3300009149 | Ga0114918_10004453 | 3300009149 assembled Ga0114918_100044539  | 12161 | 0.45 | 11 | Aquatic     | Oceanic      | Marine          |
| 3300009149 | Ga0114918_10034316 | 3300009149 assembled Ga0114918_100343162  | 3579  | 0.46 | 10 | Aquatic     | Oceanic      | Marine          |
| 3300009150 | Ga0114921_10153976 | 3300009150 assembled Ga0114921_101539761  | 1578  | 0.48 | 6  | Aquatic     | Oceanic      | Marine          |
| 3300009150 | Ga0114921_10430673 | 3300009150 assembled Ga0114921_104306731  | 958   | 0.49 | 12 | Aquatic     | Oceanic      | Marine          |
| 3300009175 | Ga0073936_10159397 | 3300009175 assembled Ga0073936_101593972  | 1678  | 0.45 | 20 | Aquatic     | Lake         | Freshwater      |
| 3300009444 | Ga0114945_10068711 | 3300009444 assembled Ga0114945_100687111  | 1952  | 0.43 | 4  | Aquatic     | Hot (42-90C) | Thermal springs |
| 3300009488 | Ga0114925_10088983 | 3300009488 assembled Ga0114925_100889832  | 1933  | 0.48 | 9  | Aquatic     | Oceanic      | Marine          |
| 3300009528 | Ga0114920_10146211 | 3300009528 assembled Ga0114920_101462111  | 1545  | 0.49 | 4  | Aquatic     | Oceanic      | Marine          |
| 3300009528 | Ga0114920_10154608 | 3300009528 assembled Ga0114920_101546082  | 1504  | 0.46 | 6  | Aquatic     | Oceanic      | Marine          |
| 3300009529 | Ga0114919_10432047 | 3300009529 assembled Ga0114919_104320471  | 913   | 0.48 | 6  | Aquatic     | Oceanic      | Marine          |
| 3300009529 | Ga0114919_10004307 | 3300009529 assembled Ga0114919_100043073  | 11417 | 0.47 | 12 | Aquatic     | Oceanic      | Marine          |
| 3300009529 | Ga0114919_10009432 | 3300009529 assembled Ga0114919_100094328  | 7658  | 0.47 | 25 | Aquatic     | Oceanic      | Marine          |
| 3300009529 | Ga0114919_10012637 | 3300009529 assembled Ga0114919_100126372  | 6544  | 0.46 | 26 | Aquatic     | Oceanic      | Marine          |
| 3300009548 | Ga0116107_1003730  | 3300009548 assembled Ga0116107_10037301   | 7421  | 0.51 | 7  | Aquatic     | Wetlands     | Freshwater      |
| 3300009631 | Ga0116115_1048540  | 3300009631 assembled Ga0116115_10485401   | 1131  | 0.5  | 4  | Aquatic     | Wetlands     | Freshwater      |
| 3300009691 | Ga0114944_1013196  | 3300009691 assembled Ga0114944_10131963   | 2777  | 0.42 | 9  | Aquatic     | Hot (42-90C) | Thermal springs |
| 3300009705 | Ga0115000_10001155 | 3300009705 assembled Ga0115000_1000115523 | 23912 | 0.43 | 11 | Aquatic     | Oceanic      | Marine          |
| 3300009788 | Ga0114923_10000413 | 3300009788 assembled Ga0114923_1000041324 | 35155 | 0.48 | 16 | Aquatic     | Oceanic      | Marine          |
| 3300009788 | Ga0114923_10008664 | 3300009788 assembled Ga0114923_100086644  | 6781  | 0.47 | 16 | Aquatic     | Oceanic      | Marine          |
| 3300009788 | Ga0114923_10042446 | 3300009788 assembled Ga0114923_100424461  | 3117  | 0.48 | 13 | Aquatic     | Oceanic      | Marine          |
| 3300009788 | Ga0114923_10001294 | 3300009788 assembled Ga0114923_100012944  | 17525 | 0.53 | 11 | Aquatic     | Oceanic      | Marine          |
| 3300009788 | Ga0114923_10000757 | 3300009788 assembled Ga0114923_1000075722 | 23652 | 0.48 | 13 | Aquatic     | Oceanic      | Marine          |
| 3300009788 | Ga0114923_10212887 | 3300009788 assembled Ga0114923_102128872  | 1390  | 0.51 | 11 | Aquatic     | Oceanic      | Marine          |
| 3300009788 | Ga0114923_10251419 | 3300009788 assembled Ga0114923_102514191  | 1279  | 0.48 | 12 | Aquatic     | Oceanic      | Marine          |
| 3300009788 | Ga0114923_10384040 | 3300009788 assembled Ga0114923_103840401  | 1032  | 0.52 | 25 | Aquatic     | Oceanic      | Marine          |
| 3300010313 | Ga0116211_1016111  | 3300010313 assembled Ga0116211_10161113   | 2430  | 0.37 | 23 | Aquatic     | Hot (42-90C) | Thermal springs |
| 3300010341 | Ga0074045_10188987 | 3300010341 assembled Ga0074045_101889872  | 1384  | 0.48 | 5  | Terrestrial | Wetlands     | Soil            |
| 3300010883 | Ga0133547_10012217 | 3300010883 assembled Ga0133547_1001221724 | 23288 | 0.43 | 11 | -           | -            | -               |
| 3300011118 | Ga0114922_10375316 | 3300011118 assembled Ga0114922_103753161  | 1181  | 0.46 | 12 | Aquatic     | Oceanic      | Marine          |
| 3300011118 | Ga0114922_10000660 | 3300011118 assembled Ga0114922_1000066037 | 33182 | 0.47 | 13 | Aquatic     | Oceanic      | Marine          |

|            |                    |                                           |       |      |    |             |                    |                                |
|------------|--------------------|-------------------------------------------|-------|------|----|-------------|--------------------|--------------------------------|
| 3300011118 | Ga0114922_10009929 | 3300011118 assembled Ga0114922_1000992910 | 8668  | 0.38 | 12 | Aquatic     | Oceanic            | Marine                         |
| 3300011118 | Ga0114922_10094539 | 3300011118 assembled Ga0114922_100945392  | 2563  | 0.51 | 7  | Aquatic     | Oceanic            | Marine                         |
| 3300011118 | Ga0114922_10017336 | 3300011118 assembled Ga0114922_100173366  | 6504  | 0.46 | 13 | Aquatic     | Oceanic            | Marine                         |
| 3300011118 | Ga0114922_10016714 | 3300011118 assembled Ga0114922_100167142  | 6621  | 0.47 | 16 | Aquatic     | Oceanic            | Marine                         |
| 3300011118 | Ga0114922_10000527 | 3300011118 assembled Ga0114922_1000052739 | 36721 | 0.47 | 72 | Aquatic     | Oceanic            | Marine                         |
| 3300011118 | Ga0114922_10071487 | 3300011118 assembled Ga0114922_100714872  | 2995  | 0.44 | 11 | Aquatic     | Oceanic            | Marine                         |
| 3300011118 | Ga0114922_10391975 | 3300011118 assembled Ga0114922_103919751  | 1152  | 0.46 | 10 | Aquatic     | Oceanic            | Marine                         |
| 3300013089 | Ga0163203_1008885  | 3300013089 assembled Ga0163203_10088853   | 2816  | 0.47 | 8  | Aquatic     | Lake               | Freshwater                     |
| 3300013089 | Ga0163203_1044557  | 3300013089 assembled Ga0163203_10445572   | 1293  | 0.46 | 8  | Aquatic     | Lake               | Freshwater                     |
| 3300013098 | Ga0164320_10076249 | 3300013098 assembled Ga0164320_100762493  | 1414  | 0.44 | 3  | Aquatic     | Hydrothermal vents | Marine                         |
| 3300013101 | Ga0164313_10752442 | 3300013101 assembled Ga0164313_107524421  | 801   | 0.37 | 3  | Aquatic     | Hydrothermal vents | Marine                         |
| 3300013126 | Ga0172367_10000182 | 3300013126 assembled Ga0172367_1000018247 | 96170 | 0.51 | 17 | Aquatic     | Lake               | Freshwater                     |
| 3300013131 | Ga0172373_10000710 | 3300013131 assembled Ga0172373_1000071034 | 54785 | 0.52 | 13 | Aquatic     | Lake               | Freshwater                     |
| 3300013131 | Ga0172373_10028983 | 3300013131 assembled Ga0172373_100289835  | 5408  | 0.64 | 31 | Aquatic     | Lake               | Freshwater                     |
| 3300013232 | Ga0170573_10313230 | 3300013232 assembled Ga0170573_103132302  | 1522  | 0.53 | 1  | Wastewater  | Mine water         | Industrial wastewater          |
| 3300014151 | Ga0181539_1000813  | 3300014151 assembled Ga0181539_100081328  | 37211 | 0.52 | 11 | Aquatic     | Wetlands           | Freshwater                     |
| 3300014152 | Ga0181533_1006199  | 3300014152 assembled Ga0181533_100619915  | 10985 | 0.53 | 7  | Aquatic     | Wetlands           | Freshwater                     |
| 3300014153 | Ga0181527_1003838  | 3300014153 assembled Ga0181527_100383817  | 13211 | 0.53 | 5  | Aquatic     | Wetlands           | Freshwater                     |
| 3300014158 | Ga0181521_10031389 | 3300014158 assembled Ga0181521_100313891  | 4041  | 0.51 | 6  | Aquatic     | Wetlands           | Freshwater                     |
| 3300014159 | Ga0181530_10051393 | 3300014159 assembled Ga0181530_100513932  | 2696  | 0.51 | 5  | Aquatic     | Wetlands           | Freshwater                     |
| 3300014491 | Ga0182014_10242217 | 3300014491 assembled Ga0182014_102422171  | 951   | 0.50 | 3  | Terrestrial | Wetlands           | Soil                           |
| 3300014638 | Ga0181536_10005502 | 3300014638 assembled Ga0181536_1000550216 | 12974 | 0.52 | 6  | Aquatic     | Wetlands           | Freshwater                     |
| 3300014654 | Ga0181525_10015597 | 3300014654 assembled Ga0181525_100155974  | 4863  | 0.44 | 6  | Aquatic     | Wetlands           | Freshwater                     |
| 3300014654 | Ga0181525_10028828 | 3300014654 assembled Ga0181525_100288281  | 3339  | 0.44 | 5  | Aquatic     | Wetlands           | Freshwater                     |
| 3300014903 | Ga0164321_10149727 | 3300014903 assembled Ga0164321_101497271  | 1025  | 0.5  | 16 | Aquatic     | Hydrothermal vents | Marine                         |
| 3300015153 | Ga0179701_1030     | 3300015153 assembled Ga0179701_103013     | 16976 | 0.5  | 1  | Aquatic     | Creek              | Freshwater                     |
| 3300015370 | Ga0180009_10003307 | 3300015370 assembled Ga0180009_1000330716 | 18408 | 0.53 | 11 | Aquatic     | Groundwater        | Freshwater                     |
| 3300017818 | Ga0181565_10010534 | 3300017818 assembled Ga0181565_100105342  | 6974  | 0.35 | 5  | Aquatic     | Intertidal zone    | Marine                         |
| 3300017925 | Ga0187856_1054136  | 3300017925 assembled Ga0187856_10541362   | 1743  | 0.5  | 4  | Aquatic     | Wetlands           | Freshwater                     |
| 3300017929 | Ga0187849_1001835  | 3300017929 assembled Ga0187849_10018356   | 21642 | 0.51 | 14 | Aquatic     | Wetlands           | Freshwater                     |
| 3300017963 | Ga0180437_10042574 | 3300017963 assembled Ga0180437_100425744  | 4361  | 0.6  | 6  | Aquatic     | Hypersaline        | Non-marine Saline and Alkaline |

|            |                    |                                           |       |      |    |             |                 |                                |
|------------|--------------------|-------------------------------------------|-------|------|----|-------------|-----------------|--------------------------------|
| 3300017971 | Ga0180438_10034967 | 3300017971 assembled Ga0180438_100349676  | 5052  | 0.59 | 8  | Aquatic     | Hypersaline     | Non-marine Saline and Alkaline |
| 3300017985 | Ga0181576_10213006 | 3300017985 assembled Ga0181576_102130061  | 1258  | 0.36 | 5  | Aquatic     | Intertidal zone | Marine                         |
| 3300017987 | Ga0180431_10153599 | 3300017987 assembled Ga0180431_101535992  | 1811  | 0.59 | 4  | Aquatic     | Hypersaline     | Non-marine Saline and Alkaline |
| 3300017991 | Ga0180434_10021706 | 3300017991 assembled Ga0180434_100217068  | 6288  | 0.48 | 9  | Aquatic     | Hypersaline     | Non-marine Saline and Alkaline |
| 3300017996 | Ga0187891_1004604  | 3300017996 assembled Ga0187891_10046047   | 8877  | 0.51 | 6  | Aquatic     | Wetlands        | Freshwater                     |
| 3300018002 | Ga0187868_1133556  | 3300018002 assembled Ga0187868_11335561   | 919   | 0.51 | 3  | Aquatic     | Wetlands        | Freshwater                     |
| 3300018004 | Ga0187865_1051425  | 3300018004 assembled Ga0187865_10514252   | 1653  | 0.5  | 6  | Aquatic     | Wetlands        | Freshwater                     |
| 3300018016 | Ga0187880_1004761  | 3300018016 assembled Ga0187880_100476116  | 9892  | 0.53 | 6  | Aquatic     | Wetlands        | Freshwater                     |
| 3300018019 | Ga0187874_10002312 | 3300018019 assembled Ga0187874_1000231216 | 14810 | 0.52 | 8  | Aquatic     | Wetlands        | Freshwater                     |
| 3300018023 | Ga0187889_10003899 | 3300018023 assembled Ga0187889_1000389911 | 12724 | 0.52 | 8  | Aquatic     | Wetlands        | Freshwater                     |
| 3300018024 | Ga0187881_10004743 | 3300018024 assembled Ga0187881_100047436  | 10849 | 0.51 | 9  | Aquatic     | Wetlands        | Freshwater                     |
| 3300018025 | Ga0187885_10055621 | 3300018025 assembled Ga0187885_100556213  | 2019  | 0.51 | 4  | Aquatic     | Wetlands        | Freshwater                     |
| 3300018026 | Ga0187857_10066560 | 3300018026 assembled Ga0187857_100665602  | 1803  | 0.5  | 6  | Aquatic     | Wetlands        | Freshwater                     |
| 3300018033 | Ga0187867_10016949 | 3300018033 assembled Ga0187867_100169492  | 4801  | 0.51 | 7  | Aquatic     | Wetlands        | Freshwater                     |
| 3300018080 | Ga0180433_10001384 | 3300018080 assembled Ga0180433_1000138425 | 40544 | 0.49 | 14 | Aquatic     | Hypersaline     | Non-marine Saline and Alkaline |
| 3300018426 | Ga0181566_10277647 | 3300018426 assembled Ga0181566_102776472  | 1217  | 0.35 | 6  | Aquatic     | Intertidal zone | Marine                         |
| 3300019082 | Ga0187852_1088400  | 3300019082 assembled Ga0187852_10884002   | 1379  | 0.5  | 3  | Aquatic     | Wetlands        | Freshwater                     |
| 3300020158 | Ga0194038_1008083  | 3300020158 assembled Ga0194038_10080834   | 3924  | 0.43 | 50 | Aquatic     | Lake            | Freshwater                     |
| 3300020164 | Ga0194037_1001670  | 3300020164 assembled Ga0194037_10016702   | 15652 | 0.5  | 33 | Aquatic     | Lake            | Freshwater                     |
| 3300020164 | Ga0194037_1001667  | 3300020164 assembled Ga0194037_100166714  | 15664 | 0.49 | 29 | Aquatic     | Lake            | Freshwater                     |
| 3300020164 | Ga0194037_1011260  | 3300020164 assembled Ga0194037_10112602   | 4419  | 0.49 | 26 | Aquatic     | Lake            | Freshwater                     |
| 3300020164 | Ga0194037_1061635  | 3300020164 assembled Ga0194037_10616352   | 1389  | 0.42 | 11 | Aquatic     | Lake            | Freshwater                     |
| 3300021055 | Ga0206226_1000122  | 3300021055 assembled Ga0206226_10001224   | 7597  | 0.55 | 7  | Terrestrial | _               | Deep subsurface                |
| 3300021055 | Ga0206226_1000308  | 3300021055 assembled Ga0206226_10003086   | 4868  | 0.55 | 7  | Terrestrial | _               | Deep subsurface                |
| 3300021070 | Ga0194056_10072680 | 3300021070 assembled Ga0194056_100726802  | 1264  | 0.48 | 6  | Aquatic     | Lake            | Freshwater                     |
| 3300021070 | Ga0194056_10011222 | 3300021070 assembled Ga0194056_100112225  | 3876  | 0.41 | 11 | Aquatic     | Lake            | Freshwater                     |
| 3300021071 | Ga0194058_10007055 | 3300021071 assembled Ga0194058_100070555  | 4741  | 0.41 | 22 | Aquatic     | Lake            | Freshwater                     |

|            |                    |                                           |       |      |     |         |             |            |
|------------|--------------------|-------------------------------------------|-------|------|-----|---------|-------------|------------|
| 3300021072 | Ga0194057_10085138 | 3300021072 assembled Ga0194057_100851382  | 1162  | 0.42 | 8   | Aquatic | Lake        | Freshwater |
| 3300021074 | Ga0194044_10007120 | 3300021074 assembled Ga0194044_100071205  | 5165  | 0.41 | 36  | Aquatic | Lake        | Freshwater |
| 3300021075 | Ga0194063_10038292 | 3300021075 assembled Ga0194063_100382923  | 2343  | 0.47 | 19  | Aquatic | Lake        | Freshwater |
| 3300021075 | Ga0194063_10003754 | 3300021075 assembled Ga0194063_100037546  | 8973  | 0.42 | 11  | Aquatic | Lake        | Freshwater |
| 3300021354 | Ga0194047_10033019 | 3300021354 assembled Ga0194047_100330195  | 2446  | 0.48 | 14  | Aquatic | Lake        | Freshwater |
| 3300021354 | Ga0194047_10052823 | 3300021354 assembled Ga0194047_100528232  | 1840  | 0.47 | 13  | Aquatic | Lake        | Freshwater |
| 3300021354 | Ga0194047_10115754 | 3300021354 assembled Ga0194047_101157541  | 1124  | 0.49 | 11  | Aquatic | Lake        | Freshwater |
| 3300021354 | Ga0194047_10015473 | 3300021354 assembled Ga0194047_100154733  | 3821  | 0.47 | 32  | Aquatic | Lake        | Freshwater |
| 3300021600 | Ga0194059_1000242  | 3300021600 assembled Ga0194059_100024217  | 26862 | 0.53 | 334 | Aquatic | Lake        | Freshwater |
| 3300021600 | Ga0194059_1012693  | 3300021600 assembled Ga0194059_10126932   | 3053  | 0.48 | 61  | Aquatic | Lake        | Freshwater |
| 3300021601 | Ga0194061_1001854  | 3300021601 assembled Ga0194061_100185413  | 11930 | 0.56 | 26  | Aquatic | Lake        | Freshwater |
| 3300021601 | Ga0194061_1015916  | 3300021601 assembled Ga0194061_10159162   | 3006  | 0.48 | 12  | Aquatic | Lake        | Freshwater |
| 3300021602 | Ga0194060_10077240 | 3300021602 assembled Ga0194060_100772402  | 1870  | 0.49 | 8   | Aquatic | Lake        | Freshwater |
| 3300021602 | Ga0194060_10157201 | 3300021602 assembled Ga0194060_101572011  | 1200  | 0.47 | 11  | Aquatic | Lake        | Freshwater |
| 3300021602 | Ga0194060_10055569 | 3300021602 assembled Ga0194060_100555694  | 2287  | 0.5  | 15  | Aquatic | Lake        | Freshwater |
| 3300021602 | Ga0194060_10002744 | 3300021602 assembled Ga0194060_100027449  | 12523 | 0.5  | 21  | Aquatic | Lake        | Freshwater |
| 3300021602 | Ga0194060_10010013 | 3300021602 assembled Ga0194060_100100132  | 6232  | 0.51 | 26  | Aquatic | Lake        | Freshwater |
| 3300021602 | Ga0194060_10079554 | 3300021602 assembled Ga0194060_100795542  | 1838  | 0.66 | 10  | Aquatic | Lake        | Freshwater |
| 3300022116 | Ga0210213_1003     | 3300022116 assembled Ga0210213_100344     | 66040 | 0.56 | 1   | Aquatic | Groundwater | Freshwater |
| 3300022204 | Ga0224496_10000336 | 3300022204 assembled Ga0224496_1000033617 | 33788 | 0.55 | 53  | Aquatic | Sediment    | Marine     |
| 3300022214 | Ga0224505_10002359 | 3300022214 assembled Ga0224505_100023598  | 11110 | 0.54 | 10  | Aquatic | Sediment    | Marine     |
| 3300022217 | Ga0224514_10083577 | 3300022217 assembled Ga0224514_100835771  | 1088  | 0.49 | 13  | Aquatic | Sediment    | Marine     |
| 3300022223 | Ga0224501_10174201 | 3300022223 assembled Ga0224501_101742011  | 1206  | 0.49 | 7   | Aquatic | Sediment    | Marine     |
| 3300022223 | Ga0224501_10197845 | 3300022223 assembled Ga0224501_101978451  | 1103  | 0.53 | 10  | Aquatic | Sediment    | Marine     |
| 3300022225 | Ga0187833_10011479 | 3300022225 assembled Ga0187833_100114793  | 7512  | 0.62 | 32  | Aquatic | Oceanic     | Marine     |
| 3300022309 | Ga0224510_10000091 | 3300022309 assembled Ga0224510_1000009124 | 76454 | 0.51 | 16  | Aquatic | Sediment    | Marine     |

**Supplementary Table S4.** Quality metrics for scaffolds containing the investigated *mamK* genes and ecosystem types of their metagenomic samples.

| Genome name                                      | 16S rRNA scaffold ID           | 16S GTDB Taxonomy                                                                                                                                                                                 |
|--------------------------------------------------|--------------------------------|---------------------------------------------------------------------------------------------------------------------------------------------------------------------------------------------------|
| Magnetococcales bacterium MAG_21055_mgc_1        | -                              | -                                                                                                                                                                                                 |
| Rhodospirillaceae bacterium MAG_22225_2-02_112   | Ga0187833_10007879             | Bacteria (domain, 51%);Proteobacteria (phylum, 50%);Alphaproteobacteria (class, 47%); unclassified_Alphaproteobacteria (order, 47%)                                                               |
| Rhodospirillaceae bacterium MAG_05596_2-02_51    | -                              | -                                                                                                                                                                                                 |
| Rhodospirillaceae bacterium MAG_05422_2-02_14    | Ga0066829_1000195              | Bacteria (domain, 49%);Proteobacteria (phylum, 49%);Alphaproteobacteria (class, 45%); unclassified_Alphaproteobacteria (order, 45%)                                                               |
| Rhodospirillaceae bacterium MAG_01419_mvb_30     | -                              | -                                                                                                                                                                                                 |
| Rhodospirillaceae bacterium MAG_04806_tlms_2     | Ga0007854_10047206             | Bacteria (domain, 69%);Proteobacteria (phylum, 66%);Alphaproteobacteria (class, 64%); unclassified_Alphaproteobacteria (order, 64%)                                                               |
| Rhodospirillaceae bacterium MAG_06104_tlms_034   | -                              | -                                                                                                                                                                                                 |
| Planctomycetes bacterium MAG_11118_pl_115        | -                              | -                                                                                                                                                                                                 |
| Planctomycetes bacterium MAG_17991_60            | -                              | -                                                                                                                                                                                                 |
| Planctomycetes bacterium MAG_18080_157           | Ga0180433_1000741215           | Bacteria (domain, 49%);Planctomycetota (phylum, 49%);Phycisphaerae (class, 49%); SG8-4(order,49%); SG8-4 (family, 41%);unclassified_SG8-4 (genus, 41%)                                            |
| Nitrospirae bacterium MAG_10313_ntr_31           | -                              | -                                                                                                                                                                                                 |
| Deltaproteobacteria bacterium MAG_17929_sntb_26  | -                              | -                                                                                                                                                                                                 |
| Deltaproteobacteria bacterium MAG_17996_sntb_20  | -                              | -                                                                                                                                                                                                 |
| Deltaproteobacteria bacterium MAG_00134_naph_006 | -                              | -                                                                                                                                                                                                 |
| Deltaproteobacteria bacterium MAG_00241_naph_010 | -                              | -                                                                                                                                                                                                 |
| Deltaproteobacteria bacterium MAG_00792_naph_016 | BS_KBA_SWE02_21mDRAFT_10000768 | Bacteria (domain, 60%);Desulfobacterota (phylum, 58%);Desulfobacteria (class, 57%); Desulfatiglandales (order, 55%);unclassified_Desulfatiglandales (family, 55%)                                 |
| Deltaproteobacteria bacterium MAG_09788_naph_37  | -                              | -                                                                                                                                                                                                 |
| Deltaproteobacteria bacterium MAG_15370_dsfb_81  | Ga0180009_10000638             | Bacteria (domain, 58%);Desulfobacterota (phylum, 57%);Desulfobacteria (class, 52%); Desulfobacterales (order, 49%);unclassified_Desulfobacterales (family, 49%)                                   |
| Deltaproteobacteria bacterium MAG_22309_dsfv_022 | Ga0224510_10000543             | Bacteria (domain, 88%);Desulfobacterota (phylum, 88%);Desulfobulbia (class, 88%); Desulfobulbales (order, 88%); Desulfurivibrionaceae (family, 88%);UBA2262 (genus, 88%)                          |
| Deltaproteobacteria bacterium MAG_22204_dsfv_001 | Ga0224496_100002163            | Bacteria (domain, 53%);Desulfobacterota (phylum, 53%);Desulfobulbia (class, 52%);Desulfobulbales (order, 52%);Desulfurivibrionaceae (family, 48%);unclassified_Desulfurivibrionaceae (genus, 48%) |
| Pelobacteraceae bacterium_MAG_21600_9_004        | -                              | -                                                                                                                                                                                                 |
| Pelobacteraceae bacterium MAG_13126_9_058        | -                              | -                                                                                                                                                                                                 |

|                                                 |                                      |                                                                                                                                                                                   |
|-------------------------------------------------|--------------------------------------|-----------------------------------------------------------------------------------------------------------------------------------------------------------------------------------|
| Pelobacteraceae bacterium MAG_21601_9_030       | Ga0194061_1000969                    | Bacteria (domain, 64%);Desulfuromonadota (phylum, 63%);Desulfuromonadia (class, 63%);<br>Geobacterales (order, 63%);Pelobacteraceae (family, 58%);Pelobacter_C (genus, 52%)       |
| Gammaproteobacteria bacterium MAG_00150_gam_010 | -                                    | -                                                                                                                                                                                 |
| Gammaproteobacteria bacterium MAG_00160_gam_009 | -                                    | -                                                                                                                                                                                 |
| Gammaproteobacteria bacterium MAG_00172_gam_018 | -                                    | -                                                                                                                                                                                 |
| Gammaproteobacteria bacterium MAG_00188_gam_006 | -                                    | -                                                                                                                                                                                 |
| Gammaproteobacteria bacterium MAG_00212_gam_1   | -                                    | -                                                                                                                                                                                 |
| Gammaproteobacteria bacterium MAG_00215_gam_020 | -                                    | -                                                                                                                                                                                 |
| Planctomycetes bacterium SCGC_JGI090-P21        | A3QODRAFT_NODE-unique_58_len_8043.58 | 92% identity with Phycisphaerae Pla1 lineage JQ989798 in SILVA SSU Database                                                                                                       |
| Omnitrophica bacterium SCGC_AG-290-C17          | Ga0179701_1060                       | Bacteria (domain, 48%);Omnitrophota (phylum, 48%);Omnitrophia (class, 48%);<br>Omnitrophales (order, 48%); unclassified_Omnitrophales (family, 48%)                               |
| Uncultured microorganism SbSrfc.SA12.01.D19     | Ga0210213_1011                       | Bacteria (domain, 45%);Desulfobacterota (phylum, 42%);unclassified_Desulfobacterota<br>(class, 42%)                                                                               |
| Elusimicrobia bacterium NORP122                 | NVTF01000082.1                       | Bacteria (domain, 99%);Elusimicrobiota (phylum, 99%);Elusimicrobia (class, 99%);<br>UBA1565 (order, 99%); UBA1565 (family, 99%);UBA1565 (genus, 99%)                              |
| Unclassified Nitrospina<br>Bin 25               | Ga0113617_1370                       | Bacteria (domain, 50%);Nitrospinota (phylum, 46%);Nitrospina (class, 46%);<br>Nitrospinales (order, 46%);Nitrospinaceae (family, 46%);unclassified_Nitrospinaceae (genus,<br>46%) |
| Nitrospinae bacterium MAG_09705_ntspn_70        | -                                    | -                                                                                                                                                                                 |
| Ca. Hydrogenedentes bacterium MAG_17971_hgd_130 | Ga0180438_10032718                   | 90% identity to Candidatus Hydrogenedens YC-ZSS-LKJ63 in SILVA SSU database                                                                                                       |
| Ca. Hydrogenedentes bacterium MAG_17963_hgd_111 | -                                    | -                                                                                                                                                                                 |

**Supplementary Table S5.** 16S rRNA gene taxonomic assignments for the MAGS, SAGs, and genomes obtained in this work.
